# Supplementary material for: Ligand-free Cu-catalyzed [3 + 2] cyclization for the synthesis of pyrrolo[1,2-a]quinolines with ambient air as a terminal oxidant
Source: Royal Society of Chemistry journal article supplement (doi:10.1039/c6ob01316c), 2016-01-01

## Supporting Information

### Ligand-free Cu-catalyzed [3+2] Cyclization for the Synthesis of Pyrrolo[1,2-*a*]quinolines with Ambient Air as Terminal Oxidant

Yang Yu,<sup>[a]</sup> Yuan Liu,<sup>[a]</sup> Aoxiao Liu,<sup>[a]</sup> Hexin Xie,<sup>[a]</sup> Hao Li,<sup>\*[a]</sup> and Wei Wang<sup>\*[a,b]</sup>

<sup>[a]</sup>State Key Laboratory of Bioengineering Reactor, Shanghai Key Laboratory of New Drug Design, and School of Pharmacy, East China University of Science and Technology, 130 Mei-long Road, Shanghai, 200237, China

<sup>[b]</sup>Department of Chemistry and Chemical Biology, University of New Mexico, Albuquerque, NM 87131-0001, USA

#### Table of contents

|                                                                                                            |     |
|------------------------------------------------------------------------------------------------------------|-----|
| I. General Information.....                                                                                | S2  |
| II. General Procedure for the Synthesis of Ethyl 2-(quinolin-2-yl)acetate derivatives .....                | S2  |
| III. General Procedure for the Synthesis of [3+2] products.....                                            | S4  |
| IV. Synthesis of polycyclic compound 6H-chromeno[3,4- <i>a</i> ]indolizin-6-one (6h).....                  | S13 |
| V. Synthesis of intermediate ethyl 5-oxo-3,5-diphenyl-2-(pyridin-2-yl) pentanoate (6d) and mechanism study | S14 |
| VI. References.....                                                                                        | S15 |
| VII. <sup>1</sup> H and <sup>13</sup> C-NMR spectra data.....                                              | S16 |

## 1. General Information

Unless otherwise noted, all reagents were obtained commercially and used without further purification. Unless otherwise specified, all other reagents were purchased from Acros, Aldrich, Fisher, Adamas-beta Co. Ltd. or TCI and used without further purification.  $^1\text{H}$  NMR spectra was recorded at 400 MHz,  $^{13}\text{C}$  NMR spectra was recorded at 100 MHz.  $^1\text{H}$  NMR spectra was recorded with tetramethylsilane ( $\delta = 0.00$  ppm) as internal reference;  $^{13}\text{C}$  NMR spectra was recorded with  $\text{CDCl}_3$  ( $\delta = 77.00$  ppm) or  $\text{DMSO}-d_6$  ( $\delta = 39.51$  ppm) as internal reference. Chemical shifts were reported in parts per million (ppm,  $\delta$ ) downfield from tetramethylsilane. Proton coupling patterns are described as singlet (s), doublet (d), triplet (t), quartet (q), multiplet (m), and broad (br).

## 2. General Procedure for the Synthesis of Ethyl 2-(quinolin-2-yl)acetate derivatives

### Procedure A<sup>1</sup>

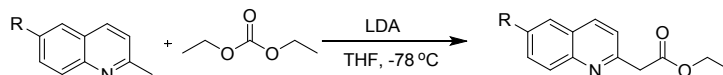

To a solution of 2-merhylquinoline (716 mg, 5 mmol) and diethyl carbonate (2.24 mL, 18.5 mmol) in anhydrous THF (8 mL), LDA (2.0 M, tetrahydrofuran solution) (7 mL, 14 mmol) was added dropwise under nitrogen atmosphere at - 78 °C. The resulting solution was stirred at - 78 °C for 1.5 h. After completion of the reaction, 5 mL water was added and the mixture was warmed gradually to rt. Then, 50 mL water was added again and the solution was extracted with ethyl acetate. The organic layer was washed with saturated sodium bicarbonate solution and brine, then dried over sodium sulfate. The solvent was removed under reduced pressure. The obtained residue was purified by column chromatography to give the compound as yellow liquid (940 mg, 87%).

### Procedure B<sup>2</sup>

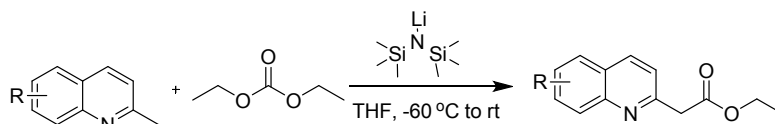

To a solution of 6-bromo-2-methylquinoline (1.11 g, 5 mmol) in anhydrous THF (20 mL), lithium hexamethyldisilazide (1 M, tetrahydrofuran solution) (20 mL, 20 mmol) was added dropwise under nitrogen atmosphere at -60 °C. The resulting solution was stirred below -60 °C for 30 min. To the reaction solution, diethyl carbonate (1.34 mL, 11 mmol) was added. Then the mixture was stirred at rt for 3 h. After the completion of the reaction, 1 N HCl was added. The reaction solution was extracted with ethyl acetate. The organic layer was washed with saturated sodium bicarbonate solution and brine, then dried over sodium sulfate. The solvent was removed under reduced pressure. The obtained residue was purified by column chromatography to give compound (1.51 g, 76%).

#### Characterization Data for Substrates

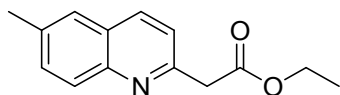

**Ethyl 2-(6-Methylquinolin-2-yl)acetate (1h).** The title compound was prepared according to general procedure **A** using 2,6-dimethylquinoline as the starting material in 70% yield as yellow liquid. <sup>1</sup>H NMR (400 MHz, CDCl<sub>3</sub>): δ 8.03 (d, *J* = 8.4 Hz, 1H), 7.94 (d, *J* = 8.4 Hz, 1H), 7.55 (s, 1H), 7.52 (d, *J* = 8.8 Hz, 1H), 7.38 (d, *J* = 8.4 Hz, 1H), 4.19 (q, *J* = 7.2 Hz, 2H), 4.01 (s, 2H), 2.52 (s, 3H), 1.25 (t, *J* = 7.2 Hz, 3H); <sup>13</sup>C NMR (100 MHz, CDCl<sub>3</sub>): δ 170.8, 154.0, 146.6, 136.3, 136.1, 132.0, 128.9, 127.2, 126.5, 121.8, 61.2, 44.9, 21.7, 14.3; HRMS (EI) *m/z* calcd for C<sub>14</sub>H<sub>15</sub>NO<sub>2</sub> [M]<sup>+</sup>: 229.1103; found: 229.1105.

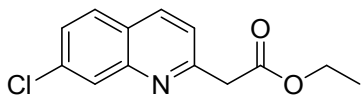

**Ethyl 2-(7-Chloroquinolin-2-yl)acetate (1i).** The title compound was prepared according to general procedure **B** using 7-chloro-2-methylquinoline as the starting material in 72% yield as yellow solid. <sup>1</sup>H NMR (400 MHz, CDCl<sub>3</sub>): δ 8.11 (d, *J* = 8.0 Hz, 1H), 8.06 (s, 1H), 7.74 (d, *J* = 8.4 Hz, 1H), 7.48 (d, *J* = 8.4 Hz, 1H), 7.43 (d, *J* = 8.4 Hz, 1H), 4.21 (q, *J* = 6.8 Hz, 2H), 4.02 (s, 2H), 1.27 (t, *J* = 6.8 Hz, 3H); <sup>13</sup>C NMR

(100 MHz, CDCl<sub>3</sub>):  $\delta$  170.4, 156.2, 148.4, 136.5, 135.6, 128.9, 128.4, 127.6, 125.5, 122.1, 61.4, 44.9, 14.3; HRMS (EI)  $m/z$  calcd for C<sub>13</sub>H<sub>12</sub>ClNO<sub>2</sub> [M]<sup>+</sup>: 249.0557; found: 249.0555.

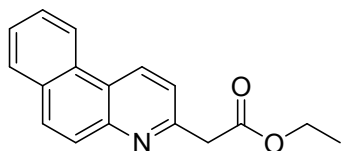

**Ethyl 2-(benzo[f]quinolin-3-yl)acetate (11).** The title compound was prepared according to general procedure A using 3-methylbenzo[f]quinoline as the starting material in 75% yield as yellow solid. <sup>1</sup>H NMR (400 MHz, CDCl<sub>3</sub>):  $\delta$  8.89 (d,  $J$  = 8.4 Hz, 1H), 8.57 (d,  $J$  = 8.4 Hz, 1H), 7.96 (d,  $J$  = 2.0 Hz, 2H), 7.91 (d,  $J$  = 7.2 Hz, 1H), 7.61 - 7.69 (m, 2H), 7.58 (d,  $J$  = 8.8 Hz, 1H), 4.22 (q,  $J$  = 7.2 Hz, 2H), 4.08 (s, 2H), 1.27 (t,  $J$  = 7.2 Hz, 3H); <sup>13</sup>C NMR (100 MHz, CDCl<sub>3</sub>):  $\delta$  170.7, 154.4, 147.9, 131.7, 131.4, 131.1, 129.6, 128.8, 128.0, 127.3, 127.2, 124.2, 122.7, 121.9, 61.2, 44.6, 14.3; HRMS (EI)  $m/z$  calcd for C<sub>17</sub>H<sub>15</sub>NO<sub>2</sub> [M]<sup>+</sup>: 265.1103; found: 265.1104.

### 3. General Procedure for Synthesis of [3+2] Products

General procedure for synthesis of compounds **3a-3f**, **3i-3l**, **5e**, **5f**, **5h**: To a solution of **1** (0.2 mmol) and **2** (0.4 mmol) in DMSO (1.0 mL) was added the Cu(OAc)<sub>2</sub> (0.06 mmol) and DBU (0.4 mmol). The resulting solution was stirred for 18 h at 75 °C in air. After the reaction was cooled to ambient temperature, the mixture was diluted with ethyl acetate, washed sequentially with saturated aq. NH<sub>4</sub>Cl and water. The organic layer was dried over Na<sub>2</sub>SO<sub>4</sub>, filtered and evaporated under reduced pressure. The crude reaction mixture was directly purified by Al<sub>2</sub>O<sub>3</sub> (PE/EA = 50:1-20:1) to give the corresponding product.

General procedure for synthesis of compounds **3g**, **3h**, **5a-5d**, **5g**: To a solution of **1** (0.2 mmol) and **2** (0.4 mmol) in DMSO (1.0 mL) was added CuCl (0.06 mmol) and TBD (0.4 mmol). The resulting solution was stirred for 12 h at 75 °C in air. After the reaction was cooled to ambient temperature, the mixture was diluted with ethyl acetate, washed sequentially with saturated aq. NH<sub>4</sub>Cl and water. The organic layer

was dried over Na<sub>2</sub>SO<sub>4</sub>, filtered and evaporated under reduced pressure. The crude reaction mixture was directly purified by Al<sub>2</sub>O<sub>3</sub> (PE/EA = 50:1-20:1) to give the corresponding product.

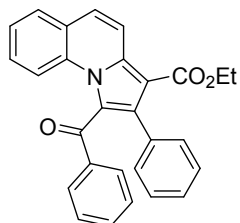

**Ethyl 1-benzoyl-2-phenylpyrrolo[1,2-a]quinoline-3-carboxylate (3a).** 81% yield, yellow solid. <sup>1</sup>H NMR (400 MHz, DMSO-*d*<sub>6</sub>): δ 8.30 (d, *J* = 9.6 Hz, 1H), 7.97 (m, 1H), 7.83 (d, *J* = 9.6 Hz, 1H), 7.64 (d, *J* = 7.6 Hz, 2H), 7.47 (m, 4H), 7.33-7.30 (t, *J* = 7.6 Hz, 2H), 7.16 (br, 5H), 4.10 (q, *J* = 7.0 Hz, 2H), 1.00 (t, *J* = 7.0 Hz, 3H). <sup>13</sup>C NMR (100 MHz, CDCl<sub>3</sub>): δ 190.2, 164.6, 138.1, 137.1, 135.6, 133.7, 133.3, 132.5, 130.5, 129.9, 129.1, 128.7, 128.3, 127.1, 127.0, 126.7, 126.1, 125.1, 125.0, 118.7, 118.4, 106.7, 59.8, 13.9. HRMS (ESI) *m/z* calcd for C<sub>28</sub>H<sub>21</sub>NO<sub>3</sub> (M+1)<sup>+</sup> 420.1600, found 420.1606.

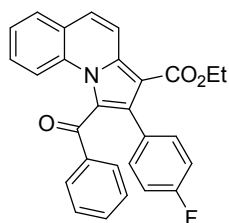

**Ethyl 1-benzoyl-2-(4-fluorophenyl)pyrrolo[1,2-a]quinoline-3-carboxylate (3b).** 67% yield, yellow solid. <sup>1</sup>H NMR (400 MHz, CDCl<sub>3</sub>): δ 8.39 (d, *J* = 9.2 Hz, 1H), 7.78 (d, *J* = 6.4 Hz, 1H), 7.70 (d, *J* = 7.6 Hz, 2H), 7.60 (d, *J* = 8.8 Hz, 2H), 7.43-7.37 (m, 3H), 7.26-7.15 (m, 4H), 6.84 (t, *J* = 8.4 Hz, 2H), 4.21 (q, *J* = 6.8 Hz, 2H), 1.12 (t, *J* = 6.8 Hz, 3H). <sup>13</sup>C NMR (100 MHz, CDCl<sub>3</sub>): δ 190.2, 164.5, 162.1(d, *J*<sub>C-F</sub> = 245 Hz), 138.1, 137.1, 134.5, 133.5, 132.5, 132.2 (d, *J*<sub>C-F</sub> = 8.1 Hz), 129.8, 129.6, 129.5, 129.1, 128.4, 126.9, 126.2, 125.1, 125.0, 118.7, 118.3, 114.0 (d, *J*<sub>C-F</sub> = 21.4 Hz), 106.7, 59.8, 14.0. HRMS(ESI) *m/z* calcd for C<sub>28</sub>H<sub>20</sub>FN<sub>3</sub> (M+1)<sup>+</sup> 438.1505, found 438.1502.

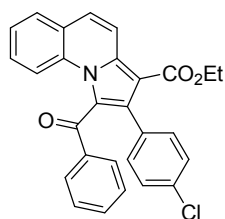

**Ethyl 1-benzoyl-2-(4-chlorophenyl)pyrrolo[1,2-a]quinoline-3-carboxylate (3c).** 74% yield, yellow solid.  $^1\text{H}$  NMR (400 MHz,  $\text{CDCl}_3$ ):  $\delta$  8.39 (d,  $J = 9.6$  Hz, 1H), 7.78-7.76 (m, 1H), 7.69 (dd,  $J_1 = 8.0$  Hz,  $J_2 = 1.2$  Hz, 2H), 7.60-7.57 (m, 2H), 7.44-7.34 (m, 3H), 7.27-7.23 (m, 2H), 7.16-7.09 (m, 4H), 4.21 (q,  $J = 7.2$  Hz, 2H), 1.13 (t,  $J = 7.2$  Hz, 3H).  $^{13}\text{C}$  NMR (100 MHz,  $\text{CDCl}_3$ ):  $\delta$  190.1, 164.4, 138.0, 137.0, 134.1, 133.5, 133.2, 132.5, 132.2, 131.9, 129.8, 129.1, 128.8, 128.5, 127.2, 126.9, 126.1, 125.1, 125.1, 118.7, 118.3, 106.6, 59.9, 14.0. HRMS(ESI), calcd for  $\text{C}_{28}\text{H}_{20}\text{ClNO}_3$  ( $\text{M}+1$ ) $^+$  454.1210, found 454.1213.

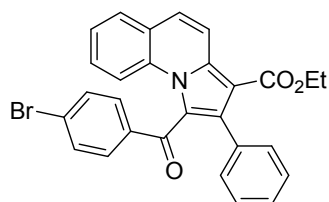

**Ethyl 1-(3-bromobenzoyl)-2-phenylpyrrolo[1,2-a]quinoline-3-carboxylate (3d).** 65% yield, yellow solid.  $^1\text{H}$  NMR (400 MHz,  $\text{CDCl}_3$ ):  $\delta$  8.40 (d,  $J = 9.6$  Hz, 1H), 7.79-7.77 (m, 1H), 7.60-7.54 (m, 4H), 7.42-7.34 (m, 4H), 7.19-7.13 (m, 5H), 4.19 (q,  $J = 7.2$  Hz, 2H), 1.07 (t,  $J = 7.2$  Hz, 3H).  $^{13}\text{C}$  NMR (100 MHz,  $\text{CDCl}_3$ ):  $\delta$  188.9, 164.5, 137.4, 137.0, 136.1, 133.5, 132.4, 131.6, 131.2, 130.5, 129.2, 128.8, 128.4, 127.3, 127.1, 127.0, 125.6, 125.2, 125.1, 118.6, 118.4, 106.8, 59.8, 13.9. HRMS(ESI), calcd for  $\text{C}_{28}\text{H}_{20}\text{BrNO}_3$  ( $\text{M}+1$ ) $^+$  498.0705, found 498.0708.

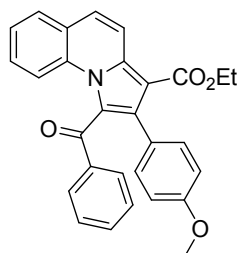

**Ethyl 1-benzoyl-2-(4-methoxyphenyl)pyrrolo[1,2-a]quinoline-3-carboxylate (3e).**

57% yield, yellow solid.  $^1\text{H}$  NMR (400 MHz,  $\text{CDCl}_3$ ):  $\delta$  8.38 (d,  $J = 9.6$  Hz, 1H), 7.77-7.68 (m, 3H), 7.60-7.54 (m, 2H), 7.40-7.34 (m, 3H), 7.26-7.21 (m, 2H), 7.15 (d,  $J = 6.8$  Hz, 2H), 6.69 (d,  $J = 8.8$  Hz, 2H), 4.23 (q,  $J = 7.0$  Hz, 2H), 3.72 (s, 3H), 1.15 (t,  $J = 7.0$  Hz, 3H).  $^{13}\text{C}$  NMR (100 MHz,  $\text{CDCl}_3$ ):  $\delta$  190.4, 164.7, 158.7, 138.1, 136.9, 135.3, 133.3, 132.5, 131.8, 129.8, 129.0, 128.6, 128.3, 126.6, 126.1, 125.7, 125.1, 124.9, 118.7, 118.4, 112.6, 106.7, 59.8, 55.2, 14.1. HRMS (ESI)  $m/z$  calcd for  $\text{C}_{29}\text{H}_{23}\text{NO}_4(\text{M}+1)^+$  450.1705, found 450.1706.

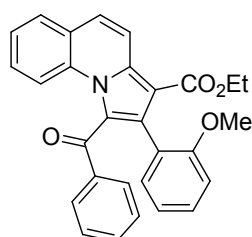

**Ethyl 1-benzoyl-2-(2-methoxyphenyl)pyrrolo[1,2-a]quinoline-3-carboxylate (3f)**

. 48% yield, yellow solid.  $^1\text{H}$  NMR (400 MHz,  $\text{CDCl}_3$ ):  $\delta$  8.39 (d,  $J = 9.6$  Hz, 1H), 7.78-7.76 (m, 3H), 7.64-7.56 (m, 2H), 7.40-7.34 (m, 3H), 7.22-7.18 (m, 2H), 7.09-7.00 (m, 2H), 6.74-6.71 (m, 1H), 6.60 (d,  $J = 8.4$  Hz, 1H), 4.14 (q,  $J = 7.2$  Hz, 2H), 3.62 (s, 3H), 1.03 (t,  $J = 7.2$  Hz, 3H).  $^{13}\text{C}$  NMR (100 MHz,  $\text{CDCl}_3$ ):  $\delta$  189.5, 164.6, 156.8, 138.2, 137.7, 133.1, 132.9, 132.6, 131.6, 129.7, 129.0, 128.9, 128.5, 127.9, 126.8, 126.2, 125.1, 124.8, 123.3, 119.6, 119.1, 118.4, 109.6, 107.4, 59.5, 55.0, 13.9. HRMS(ESI), calcd for  $\text{C}_{29}\text{H}_{23}\text{NO}_4(\text{M}+1)^+$  450.1705, found 450.1707.

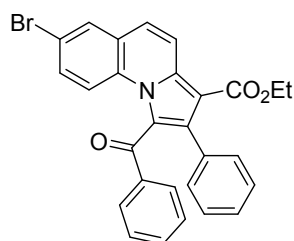

**Ethyl 1-benzoyl-7-bromo-2-phenylpyrrolo[1,2-a]quinoline-3-carboxylate (3g)**

. 64% yield, yellow solid.  $^1\text{H}$  NMR (400 MHz,  $\text{CDCl}_3$ ):  $\delta$  8.42 (d,  $J = 9.6$  Hz, 1H), 7.90 (br, 1H), 7.70 (d,  $J = 7.6$  Hz, 2H), 7.49-7.37 (m, 4H), 7.26-7.10 (m, 7H), 4.18 (q,  $J = 7.2$  Hz, 2H), 1.07 (t,  $J = 6.8$  Hz, 3H).  $^{13}\text{C}$  NMR (100 MHz,  $\text{CDCl}_3$ ):  $\delta$  190.1, 164.4, 137.9, 136.8, 135.8, 133.5, 133.4, 131.4, 131.3, 131.1, 130.5, 129.9, 128.4, 127.2,

127.0, 126.8, 126.2, 125.4, 120.3, 119.6, 118.2, 107.3, 59.9, 13.9. HRMS(ESI), calcd for  $C_{28}H_{20}BrNO_3$  ( $M+1$ )<sup>+</sup> 498.0705, found 498.0709.

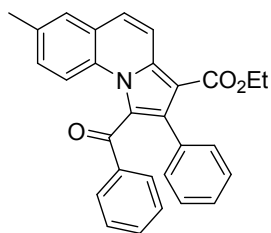

**Ethyl 1-benzoyl-7-methyl-2-phenylpyrrolo[1,2-a]quinoline-3-carboxylate (3h).**

78% yield, yellow solid. <sup>1</sup>H NMR (400 MHz, CDCl<sub>3</sub>): δ 8.36 (d, *J* = 9.6 Hz, 1H), 7.71 (d, *J* = 8.4 Hz, 2H), 7.54-7.47 (m, 3H), 7.39 (t, *J* = 7.2 Hz, 1H), 7.26-7.09 (m, 8H), 4.18 (q, *J* = 7.2 Hz, 2H), 2.42 (s, 3H), 1.07 (t, *J* = 7.2 Hz, 3H). <sup>13</sup>C NMR (100 MHz, CDCl<sub>3</sub>): δ 190.2, 164.7, 138.2, 136.9, 135.5, 134.7, 133.8, 133.2, 130.6, 130.5, 130.0, 129.9, 128.7, 128.3, 127.0, 126.9, 126.6, 125.9, 125.2, 118.5, 118.3, 106.5, 59.7, 20.9, 13.9. HRMS(ESI), calcd for  $C_{29}H_{23}NO_3$  ( $M+1$ )<sup>+</sup> 434.1756, found 434.1754.

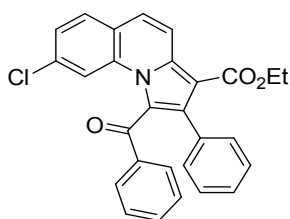

**Ethyl 1-benzoyl-8-chloro-2-phenylpyrrolo[1,2-a]quinoline-3-carboxylate (3i).**

47% yield, yellow solid. <sup>1</sup>H NMR (400 MHz, DMSO-*d*<sub>6</sub>): δ 8.33 (d, *J* = 9.6 Hz, 1H), 8.07 (d, *J* = 8.8 Hz, 1H), 7.88 (d, *J* = 9.2 Hz, 1H), 7.67 (d, *J* = 8.0 Hz, 2H), 7.59-7.47 (m, 3H), 7.36-7.32 (m, 2H), 7.17 (m, 5H), 4.11 (q, *J* = 6.4 Hz, 2H), 1.01 (t, *J* = 7.2 Hz, 3H). <sup>13</sup>C NMR (100 MHz, CDCl<sub>3</sub>): δ 189.8, 164.4, 138.0, 137.2, 136.2, 134.3, 133.4, 133.3, 133.0, 130.5, 130.0, 129.8, 128.3, 127.2, 127.0, 126.3, 126.0, 125.6, 123.6, 118.8, 118.6, 107.2, 59.9, 13.9. HRMS(ESI), calcd for  $C_{28}H_{20}ClNO_3$  ( $M+1$ )<sup>+</sup> 454.1210, found 454.1212.



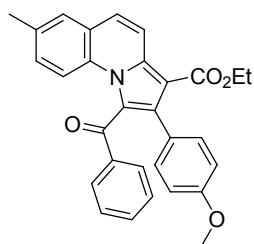

**Ethyl 1-benzoyl-2-(4-methoxyphenyl)-7-methylpyrrolo[1,2-a]quinoline-3-**

**Carboxylate (3j).** 53% yield, yellow solid.  $^1\text{H}$  NMR (400 MHz,  $\text{CDCl}_3$ ):  $\delta$  8.33 (d,  $J = 9.2$  Hz, 1H), 7.71 (d,  $J = 7.2$  Hz, 2H), 7.54-7.47 (m, 3H), 7.39 (t,  $J = 7.6$  Hz, 1H), 7.26-7.09 (m, 5H), 6.67 (d,  $J = 8.4$  Hz, 2H) 4.18 (q,  $J = 7.2$  Hz, 2H), 3.71 (s, 3H), 2.43 (s, 3H), 1.07 (t,  $J = 7.2$  Hz, 3H).  $^{13}\text{C}$  NMR (100 MHz,  $\text{CDCl}_3$ ):  $\delta$  190.4, 164.7, 158.7, 138.2, 136.8, 135.2, 134.7, 133.2, 131.8, 130.6, 130.0, 129.8, 128.6, 128.3, 126.5, 126.0, 125.8, 125.1, 118.5, 118.3, 112.5, 106.5, 59.7, 55.2, 20.9, 14.1. HRMS(ESI), calcd for  $\text{C}_{30}\text{H}_{25}\text{NO}_4$  ( $\text{M}+1$ ) $^+$  464.1862, found 464.1859.

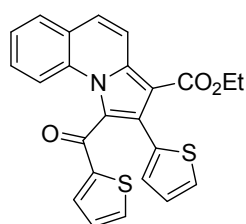

**Ethyl 2-(thiophen-2-yl)-1-(thiophene-2-carbonyl)pyrrolo[1,2-a]quinoline-3-carboxylate (3k).** 50% yield, yellow solid.  $^1\text{H}$  NMR (400 MHz,  $\text{CDCl}_3$ ):  $\delta$  8.35 (d,  $J = 9.2$  Hz, 1H), 7.77 (m, 2H), 7.62 (d,  $J = 4.4$  Hz, 1H), 7.54 (d,  $J = 9.6$  Hz, 1H), 7.40 (br, 3H), 7.24 (d,  $J = 4.8$  Hz, 1H), 6.95 (d,  $J = 12.0$  Hz, 2H), 6.84 (br, 1H), 4.29 (q,  $J = 6.8$  Hz, 2H), 1.22 (t,  $J = 7.2$  Hz, 3H).  $^{13}\text{C}$  NMR (100 MHz,  $\text{CDCl}_3$ ):  $\delta$  182.5, 164.3, 144.9, 136.6, 135.7, 135.5, 133.6, 132.4, 129.5, 129.2, 128.9, 128.1, 126.7, 126.5, 126.4, 126.2, 126.1, 125.2, 125.1, 118.3, 118.2, 107.2, 60.0, 14.1. HRMS(ESI), calcd for  $\text{C}_{24}\text{H}_{17}\text{NO}_3\text{S}_2$  ( $\text{M}+1$ ) $^+$  432.0728, found 432.0728.

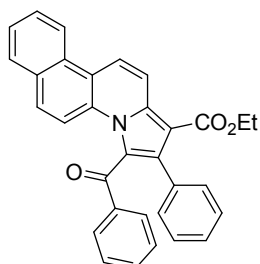

**Ethyl 3-benzoyl-2-phenylbenzo[*f*]pyrrolo[1,2-*a*]quinoline-1-carboxylate (3l).** 70% yield, yellow solid. <sup>1</sup>H NMR (400 MHz, CDCl<sub>3</sub>): δ 8.62-8.58 (m, 2H), 8.50 (d, *J* = 10.0 Hz, 1H), 7.88 (d, *J* = 8.0 Hz, 1H), 7.78-7.56 (m, 6H), 7.38 (t, *J* = 7.2 Hz, 1H), 7.25-7.11 (m, 7H), 4.21 (q, *J* = 6.8 Hz, 2H), 1.09 (t, *J* = 7.2 Hz, 3H). <sup>13</sup>C NMR (100 MHz, CDCl<sub>3</sub>): δ 189.6, 164.6, 138.3, 137.5, 136.9, 133.8, 133.1, 131.0, 130.5, 130.4, 129.9, 129.9, 129.6, 128.8, 128.3, 127.7, 127.1, 127.0, 126.5, 125.9, 122.9, 121.7, 120.7, 118.4, 118.3, 106.0, 59.8, 13.9. HRMS(ESI), calcd for C<sub>32</sub>H<sub>23</sub>NO<sub>3</sub> (M+1)<sup>+</sup> 470.1756, found 470.1761.

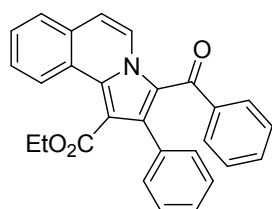

**Ethyl 3-benzoyl-2-phenylpyrrolo[2,1-*a*]isoquinoline-1-carboxylate (5a).** 63% yield, yellow solid. <sup>1</sup>H NMR (400 MHz, CDCl<sub>3</sub>): δ 9.15 (d, *J* = 7.6 Hz, 1H), 8.67-8.64 (m, 1H), 7.74-7.72 (m, 1H), 7.61-7.56 (m, 2H), 7.47 (dd, *J*<sub>1</sub> = 8.0 Hz, *J*<sub>2</sub> = 1.2 Hz, 2H), 7.21-7.01 (m, 9H), 4.18 (q, *J* = 7.2 Hz, 2H), 0.95 (t, *J* = 7.2 Hz, 3H). <sup>13</sup>C NMR (100 MHz, CDCl<sub>3</sub>): δ 188.2, 167.4, 139.1, 136.6, 134.1, 132.4, 131.6, 130.6, 129.8, 129.6, 128.6, 127.9, 127.5, 127.3, 127.1, 127.0, 125.2, 124.4, 124.1, 122.5, 114.4, 111.1, 61.2, 13.6. HRMS(ESI), calcd for C<sub>28</sub>H<sub>21</sub>NO<sub>3</sub> (M+1)<sup>+</sup> 420.1600, found 420.1598.

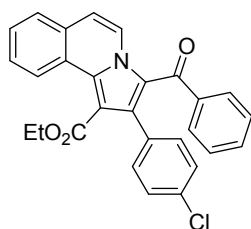

**Ethyl 3-benzoyl-2-(4-chlorophenyl)pyrrolo[2,1-*a*]isoquinoline-1-carboxylate (5b).** 63% yield, yellow solid. <sup>1</sup>H NMR (400 MHz, CDCl<sub>3</sub>): δ 9.14 (d, *J* = 7.6 Hz, 1H), 8.66-8.64 (m, 1H), 7.75-7.73 (m, 1H), 7.62-7.56 (m, 2H), 7.44 (dd, *J*<sub>1</sub> = 8.0 Hz, *J*<sub>2</sub> = 1.2 Hz, 2H), 7.29-7.25 (m, 1H), 7.17 (d, *J* = 7.6 Hz, 1H), 7.10-6.99 (m, 6H), 4.21 (q, *J* = 7.0 Hz, 2H), 1.02 (t, *J* = 7.0 Hz, 3H). <sup>13</sup>C NMR (100 MHz, CDCl<sub>3</sub>): δ 188.1, 167.1,

139.0, 135.3, 133.2, 132.7, 132.6, 131.8, 131.7, 129.9, 129.5, 128.7, 128.0, 127.7, 127.5, 127.2, 125.3, 124.4, 124.1, 122.6, 114.6, 111.0, 61.3, 13.7. HRMS(ESI), calcd for  $C_{28}H_{20}ClNO_3$  ( $M+1$ )<sup>+</sup> 454.1210, found 454.1207.

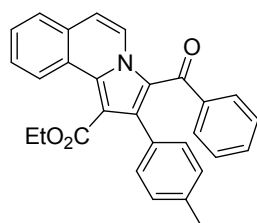

**Ethyl 3-benzoyl-2-(p-tolyl)pyrrolo[2,1-a]isoquinoline-1-carboxylate (5c).** 57% yield, yellow solid. <sup>1</sup>H NMR (400 MHz, CDCl<sub>3</sub>): δ 9.14 (d, *J* = 7.6 Hz, 1H), 8.62-8.60 (m, 1H), 7.74-7.71 (m, 1H), 7.60-7.55 (m, 2H), 7.46 (dd, *J*<sub>1</sub> = 8.0 Hz, *J*<sub>2</sub> = 1.2 Hz, 2H), 7.22-7.18 (m, 1H), 7.14 (d, *J* = 7.6 Hz, 1H), 7.06-7.02 (m, 2H), 6.98 (d, *J* = 8.0 Hz, 2H), 6.82 (d, *J* = 7.6 Hz, 2H), 4.21 (q, *J* = 7.2 Hz, 2H), 2.18 (s, 3H), 1.01 (t, *J* = 7.2 Hz, 3H). <sup>13</sup>C NMR (100 MHz, CDCl<sub>3</sub>): δ 188.3, 167.5, 139.1, 136.7, 136.6, 132.2, 131.3, 130.9, 130.5, 129.8, 129.6, 128.5, 128.0, 127.8, 127.5, 127.1, 125.1, 124.5, 124.1, 122.5, 114.2, 111.1, 61.2, 21.0, 13.6. HRMS(ESI), calcd for  $C_{29}H_{23}NO_3$  ( $M+1$ )<sup>+</sup> 434.1756, found 434.1752.

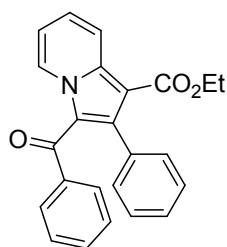

**Ethyl 3-benzoyl-2-phenylindolizine-1-carboxylate<sup>3</sup> (5d).** 81% yield, yellow solid. <sup>1</sup>H NMR (400 MHz, DMSO-*d*<sub>6</sub>): δ 9.45 (d, *J* = 6.8 Hz, 1H), 8.39 (d, *J* = 8.8 Hz, 1H), 7.62-7.58 (m, 1H), 7.36 (d, *J* = 7.2 Hz, 2H), 7.26-7.21 (m, 2H), 7.09-6.99 (m, 7H), 4.09 (q, *J* = 7.0 Hz, 2H), 1.02 (t, *J* = 7.0 Hz, 3H). <sup>13</sup>C NMR (100 MHz, DMSO-*d*<sub>6</sub>): δ 187.9, 163.8, 139.4, 139.3, 138.6, 134, 131.6, 131.5, 129.5, 128.3, 127.9, 127.3, 127.0, 122.3, 119.5, 115.8, 104.2, 100.0, 59.7, 14.2.

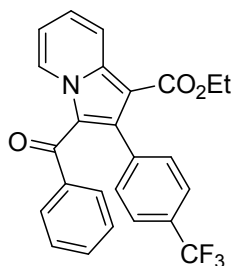

**Ethyl 3-benzoyl-2-(4-(trifluoromethyl)phenyl)indolizine-1-carboxylate (5e).** 77% yield, yellow solid.  $^1\text{H}$  NMR (400 MHz,  $\text{DMSO}-d_6$ ):  $\delta$  9.53 (d,  $J = 7.2$  Hz, 1H), 8.41 (d,  $J = 8.8$  Hz, 1H), 7.65-7.61 (m, 1H), 7.31-7.27 (m, 7H), 7.21-7.18 (m, 1H), 7.06-7.02 (m, 2H), 4.07 (q,  $J = 7.0$  Hz, 2H), 0.98 (t,  $J = 7.0$  Hz, 3H).  $^{13}\text{C}$  NMR (100 MHz,  $\text{CDCl}_3$ ):  $\delta$  188.0, 164.0, 139.3, 139.2, 138.3, 138.2, 131.5, 131.1, 129.1( $q, ^1J_{\text{C-F}} = 30\text{Hz}$ ), 128.9, 128.3, 127.6, 127.5, 124.0 ( $q, ^2J_{\text{C-F}} = 270$  Hz), 123.6 ( $q, ^3J_{\text{C-F}} = 3.7\text{Hz}$ ), 122.4, 119.8, 115.3, 104.8, 59.9, 13.9. HRMS(ESI), calcd for  $\text{C}_{25}\text{H}_{18}\text{F}_3\text{NO}_3$  ( $\text{M}+1$ ) $^+$  438.1317, found 438.1317.

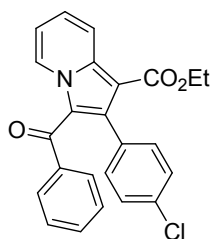

**Ethyl 3-benzoyl-2-(4-chlorophenyl)indolizine-1-carboxylate<sup>3</sup> (5f).** 68% yield, yellow solid.  $^1\text{H}$  NMR (400 MHz,  $\text{CDCl}_3$ ):  $\delta$  9.62 (d,  $J = 7.0$  Hz, 1H), 8.46 (d,  $J = 9.0$  Hz, 1H), 7.42 (t,  $J = 7.5$  Hz, 1H), 7.32 (d,  $J = 8.0$  Hz, 2H), 7.22 (t,  $J = 7.5$  Hz, 1H), 7.06-6.94 (m, 7H), 4.18 (q,  $J = 7.0$  Hz, 2H), 1.12 (t,  $J = 7.0$  Hz, 3H).  $^{13}\text{C}$  NMR (100 MHz,  $\text{CDCl}_3$ ):  $\delta$  188.2, 164.1, 139.3, 139.2, 139.1, 133.1, 132.5, 132.4, 131.1, 129.1, 128.2, 127.7, 127.5, 126.9, 122.4, 119.9, 115.1, 104.6, 59.7, 13.9.

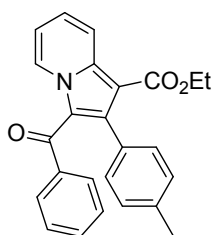

**Ethyl 3-benzoyl-2-(p-tolyl)indolizine-1-carboxylate (5g).** 52% yield, yellow solid.  $^1\text{H}$  NMR (400 MHz,  $\text{CDCl}_3$ ):  $\delta$  9.62 (d,  $J = 6.8$  Hz, 1H), 8.45 (d,  $J = 8.8$  Hz, 1H),

7.43-7.39 (m, 1H), 7.34 (dd,  $J_1 = 8.4$  Hz,  $J_2 = 1.2$  Hz, 2H), 7.18-7.14 (m, 1H), 7.04-6.95 (m, 5H), 6.78 (d,  $J = 8.0$  Hz, 2H), 4.22 (q,  $J = 7.2$  Hz, 2H), 2.17 (s, 3H), 1.16 (t,  $J = 7.2$  Hz, 3H).  $^{13}\text{C}$  NMR (100 MHz,  $\text{CDCl}_3$ ):  $\delta$  188.5, 164.4, 140.7, 139.4, 139.2, 136.7, 131.1, 130.7, 130.6, 129.2, 128.1, 127.5, 127.4, 127.1, 122.4, 119.8, 114.8, 104.7, 59.7, 21.1, 14.1. HRMS(ESI), calcd for  $\text{C}_{25}\text{H}_{21}\text{NO}_3$  ( $\text{M}+1$ ) $^+$  384.1600, found 384.1601.

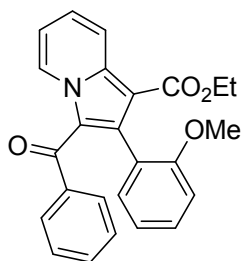

**Ethyl 3-benzoyl-2-(2-methoxyphenyl)indolizine-1-carboxylate (5h).** 48% yield, yellow solid.  $^1\text{H}$  NMR (400 MHz,  $\text{CDCl}_3$ ):  $\delta$  9.65 (d,  $J = 7.2$  Hz, 1H), 8.46 (d,  $J = 9.2$  Hz, 1H), 7.42-7.37 (m, 3H), 7.17-7.13 (m, 1H), 7.03-6.97 (m, 4H), 6.92 (d,  $J = 8.8$  Hz, 1H), 6.65-6.61 (m, 1H), 6.49 (d,  $J = 8.4$  Hz, 1H), 4.15 (q,  $J = 7.2$  Hz, 2H), 3.65 (s, 3H), 1.05 (t,  $J = 7.2$  Hz, 3H).  $^{13}\text{C}$  NMR (100 MHz,  $\text{CDCl}_3$ ):  $\delta$  188.2, 164.4, 156.5, 139.5, 139.3, 136.7, 132.2, 130.9, 129.0, 128.7, 128.2, 127.1, 126.8, 123.7, 122.1, 119.7, 119.5, 114.7, 109.4, 105.4, 59.5, 55.0, 13.9. HRMS(ESI), calcd for  $\text{C}_{25}\text{H}_{21}\text{NO}_4$  ( $\text{M}+1$ ) $^+$  400.1549, found 400.1553.

#### 4. Synthesis of polycyclic compound 6H-chromeno[3,4-a]indolizin-6-one (6h)

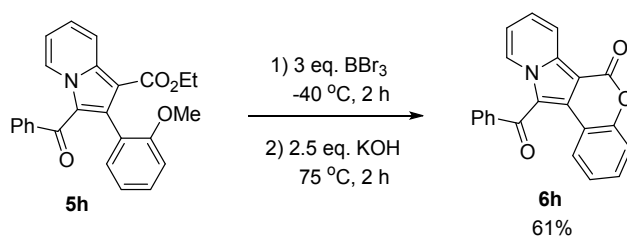

To a solution of ethyl 3-benzoyl-2-(2-methoxyphenyl)indolizine-1-carboxylate (**5h**, 1 mmol, 40 mg) in the solvent of dichloromethane (2 mL) was added  $\text{BBr}_3$  (3 eq. 30  $\mu\text{L}$ ) dropwise for 15 min at  $-40$  °C. The mixture was stirred for 2 h at the same

temperature. After the reaction was completed, excess  $\text{BBr}_3$  was quenched by water at  $-40\text{ }^\circ\text{C}$ . Then the reaction was diluted with ethyl acetate in room temperature, washed sequentially with water. The organic layer was dried over  $\text{Na}_2\text{SO}_4$ , filtered and evaporated under reduced pressure. The residue was added 2.5 mL aq.  $\text{KOH}$  (1 mol/mL) and stirred for 2 h at  $75\text{ }^\circ\text{C}$ . The mixture was diluted with ethyl acetate, washed with water followed by brine. The organic layer was dried over  $\text{Na}_2\text{SO}_4$ , filtered and evaporated under reduced pressure and the residue was purified by  $\text{Al}_2\text{O}_3$  (PE/EA = 50:1-20/1) to give **6h** as a yellow solid in 61% yield.  $^1\text{H}$  NMR (400 MHz,  $\text{CDCl}_3$ ):  $\delta$  9.30 (d,  $J = 7.2$  Hz, 1H), 8.60 (d,  $J = 8.8$  Hz, 1H), 7.88 (dd,  $J_1 = 8.4$  Hz,  $J_2 = 1.2$  Hz, 2H), 7.62-7.53 (m, 2H), 7.46-7.43 (m, 2H), 7.38-7.27 (m, 2H), 7.18-7.14 (m, 1H), 7.00 (dd,  $J_1 = 8.0$  Hz,  $J_2 = 1.2$  Hz, 1H), 6.79-6.75 (m, 1H).  $^{13}\text{C}$  NMR (100 MHz,  $\text{CDCl}_3$ ):  $\delta$  187.8, 158.4, 153.2, 139.1, 137.4, 133.6, 130.5, 130.0, 130.0, 129.2, 128.0, 127.8, 127.7, 123.2, 119.6, 117.8, 117.4, 116.6, 115.0, 99.1. HRMS(ESI), calcd for  $\text{C}_{22}\text{H}_{13}\text{NO}_3$  ( $\text{M}+1$ ) $^+$  340.0974, found 340.0970.

## 5. Synthesis of intermediate ethyl 5-oxo-3,5-diphenyl-2-(pyridin-2-yl)pentanoate and mechanism study

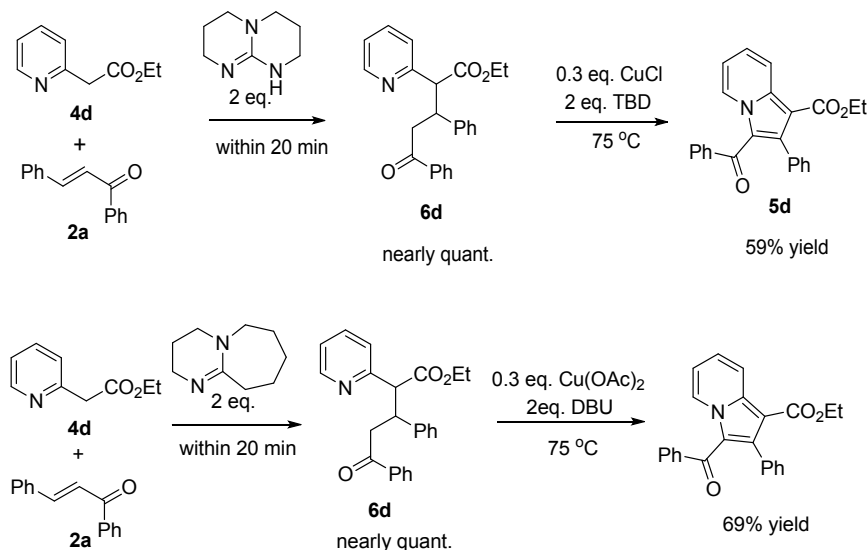

To a solution of **4d** (0.2 mmol) and **2a** (0.4 mmol) in DMSO (1.0 mL) was added TBD or DBU (0.4 mmol). The resulting solution was stirred for 20 min at room temperature. The mixture was diluted with ethyl acetate, washed sequentially with

saturated aq.  $\text{NH}_4\text{Cl}$  and water. The organic layer was dried over  $\text{Na}_2\text{SO}_4$ , filtered and evaporated under reduced pressure. The crude reaction mixture was directly purified by  $\text{Al}_2\text{O}_3$  (PE/EA = 20:1-4:1) to give the intermediate **6d** with nearly quantitative yield (dr = 1:0.42).  $^1\text{H}$  NMR (400 MHz,  $\text{CDCl}_3$ ):  $\delta$  8.52 (d,  $J$  = 4.4 Hz, 1H), 8.35 (d,  $J$  = 4.4 Hz, 0.42H), 7.84 (d,  $J$  = 8.0Hz, 0.84H), 7.69-7.52 (m, 4H), 7.49-7.23 (m, 6H), 7.22-7.12 (m, 4H), 7.12-7.03 (m, 1.42H), 7.03 -6.90 (m, 2.26H), 4.27-4.17 (m, 2.84), 4.10 (q,  $J$  = 6.4Hz, 0.84H), 3.80 (q,  $J$  = 7.8Hz, 2H), 3.43-3.53 (m, 0.84H), 3.28-3.20 (m, 1H), 2.92 (d,  $J$  = 8.8Hz, 1H), 1.28 (t,  $J$  = 6.4Hz, 1.26H), 0.80 (t,  $J$  = 7.8Hz, 3H).  $^{13}\text{C}$  NMR (100 MHz,  $\text{CDCl}_3$ ):  $\delta$  198.1, 198.0, 172.1, 171.5, 157.0, 156.9, 149.5, 149.2, 141.6, 140.7, 137.1, 137.0, 136.9, 136.2, 132.9, 132.8, 132.8, 128.5, 128.4, 128.4, 128.3, 128.2, 128.1, 128.0, 126.9, 126.5, 123.7, 123.2, 122.8, 122.0, 61.2, 60.7, 60.3, 59.6, 44.2, 44.0, 43.3, 42.7, 14.2, 13.8. HRMS(ESI), calcd for  $\text{C}_{24}\text{H}_{24}\text{NO}_3$ . 374.1753, found 374.1756.

To a solution of **6d** in DMSO (1.0 mL) was added  $\text{CuCl}$  (0.06 mmol) and TBD (0.4 mmol). The resulting solution was stirred for 12 h at 75 °C in air. After the reaction was cooled to ambient temperature, the mixture was diluted with ethyl acetate, washed sequentially with saturated aq.  $\text{NH}_4\text{Cl}$  and water. The organic layer was dried over  $\text{Na}_2\text{SO}_4$ , filtered and evaporated under reduced pressure. The crude reaction mixture was directly purified by  $\text{Al}_2\text{O}_3$  (PE/EA = 50:1-20:1) to give **5d** in 59% yield.

To a solution of **6d** in DMSO (1.0 mL) was added  $\text{Cu}(\text{OAc})_2$  (0.06 mmol) and DBU (0.4 mmol). The resulting solution was stirred for 12 h at 75 °C in air. After the reaction was cooled to ambient temperature, the mixture was diluted with ethyl acetate, washed sequentially with saturated aq.  $\text{NH}_4\text{Cl}$  and water. The organic layer was dried over  $\text{Na}_2\text{SO}_4$ , filtered and evaporated under reduced pressure. The crude reaction mixture was directly purified by  $\text{Al}_2\text{O}_3$  (PE/EA = 50:1-20:1) to give **5d** in 69% yield.

## 6. References

- (1) Z.-H. Zhang, G.-L. Zhou, Y.-T. Song, WO 2011097946A1.
- (2) M. Koji, K. Shiro, Y. Naoki, K. Manabu, K. Terukazu, N. Mado, K. Eiichi, Y. Mitsuhiro, US 20140323722A1.

(3) D. C. Mohan, C. Ravi, V. Pappula, S. Adimurthy, *J. Org. Chem.* 2015, **80**, 6846.

## 7. $^1\text{H}$ and $^{13}\text{C}$ -NMR spectra data

### Ethyl 2-(6-methylquinolin-2-yl)acetate (**1h**)

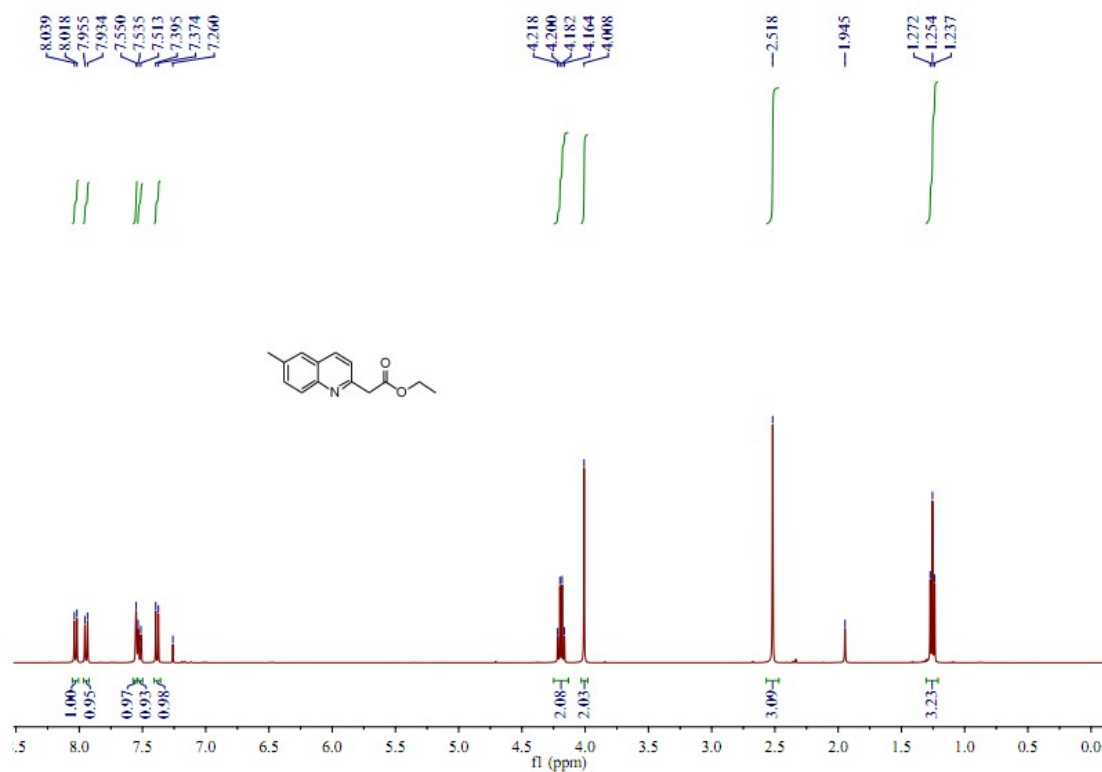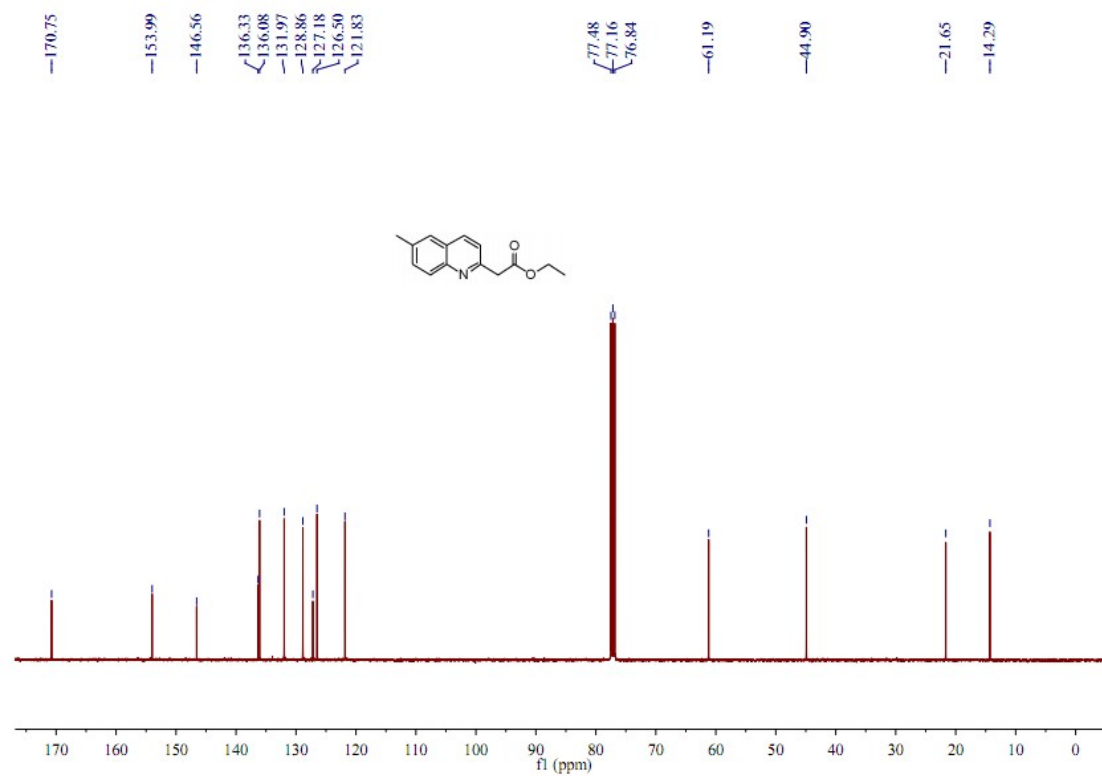



### Ethyl 2-(7-chloroquinolin-2-yl)acetate (1i)

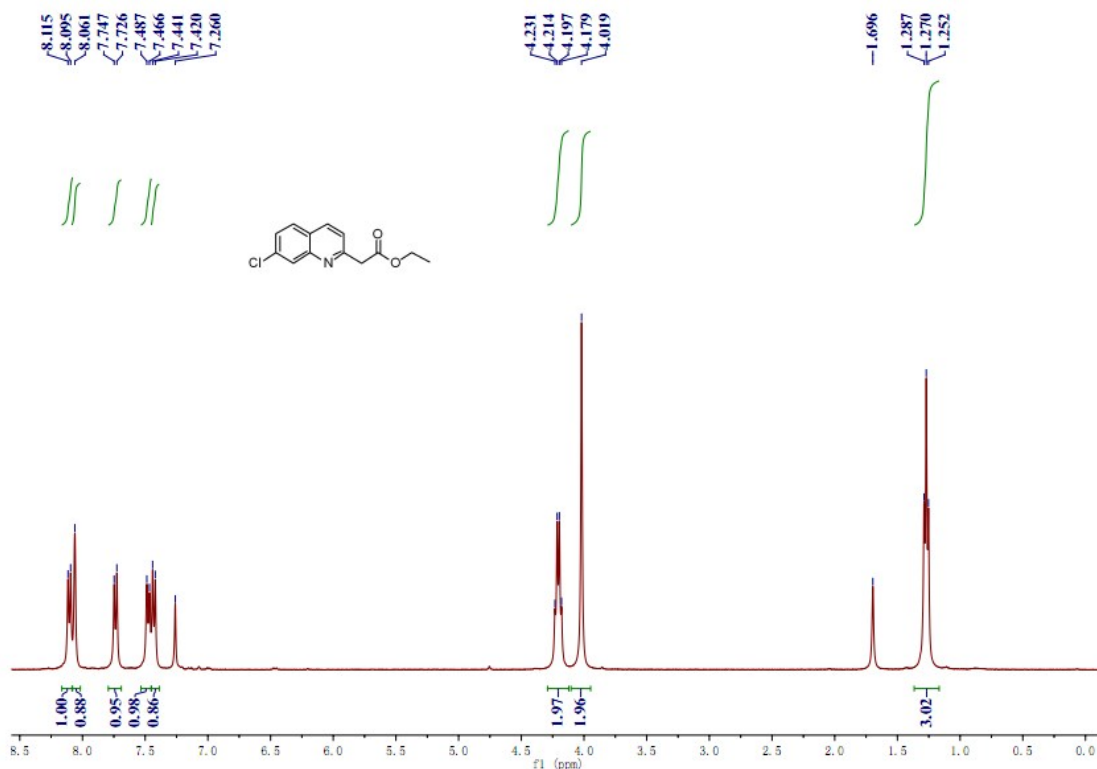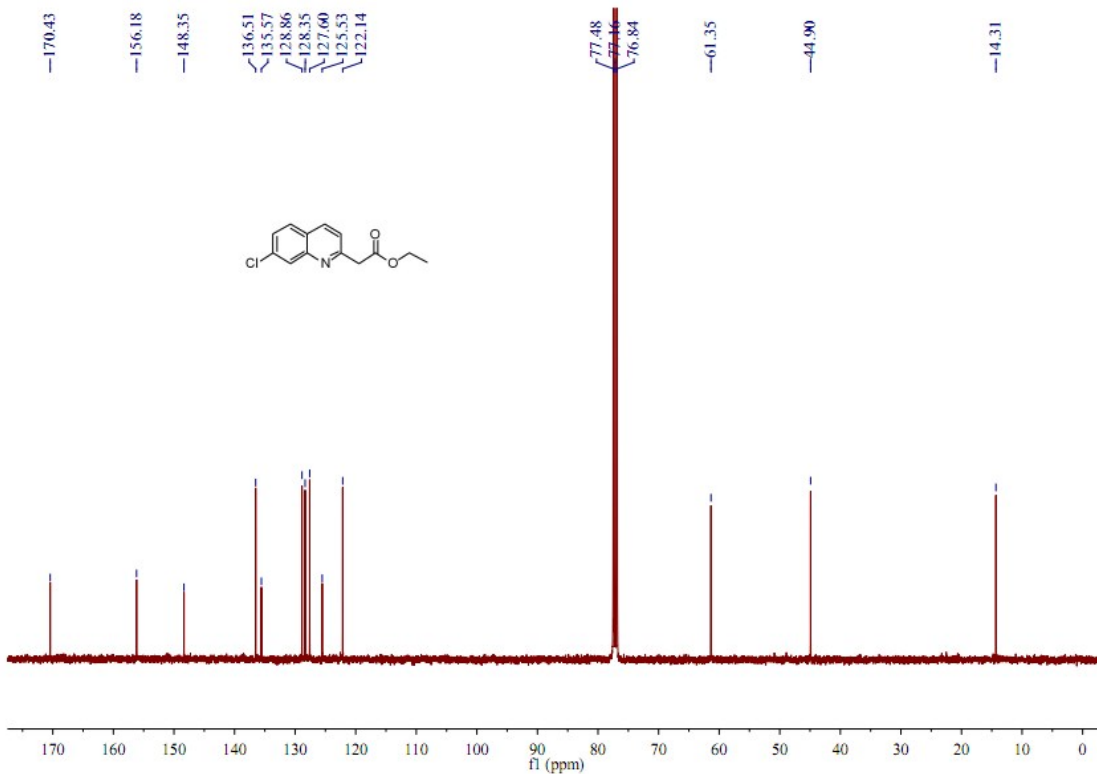

# Ethyl 2-(benzo[f]quinolin-3-yl)acetate (11)

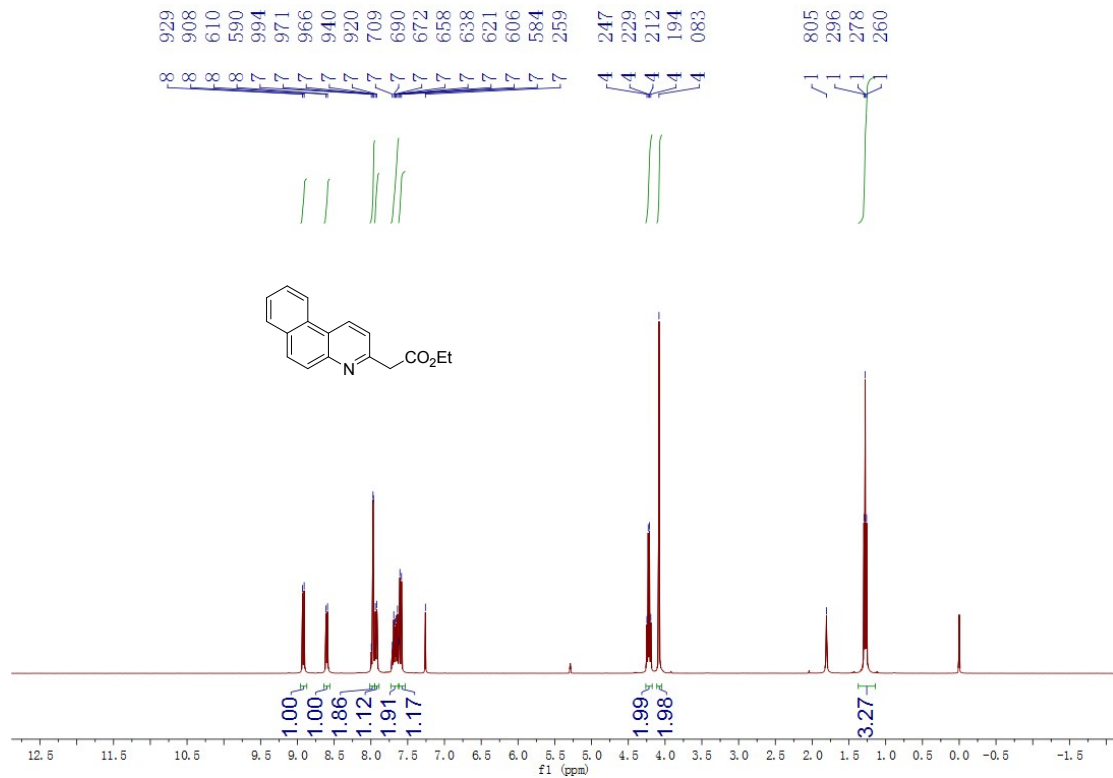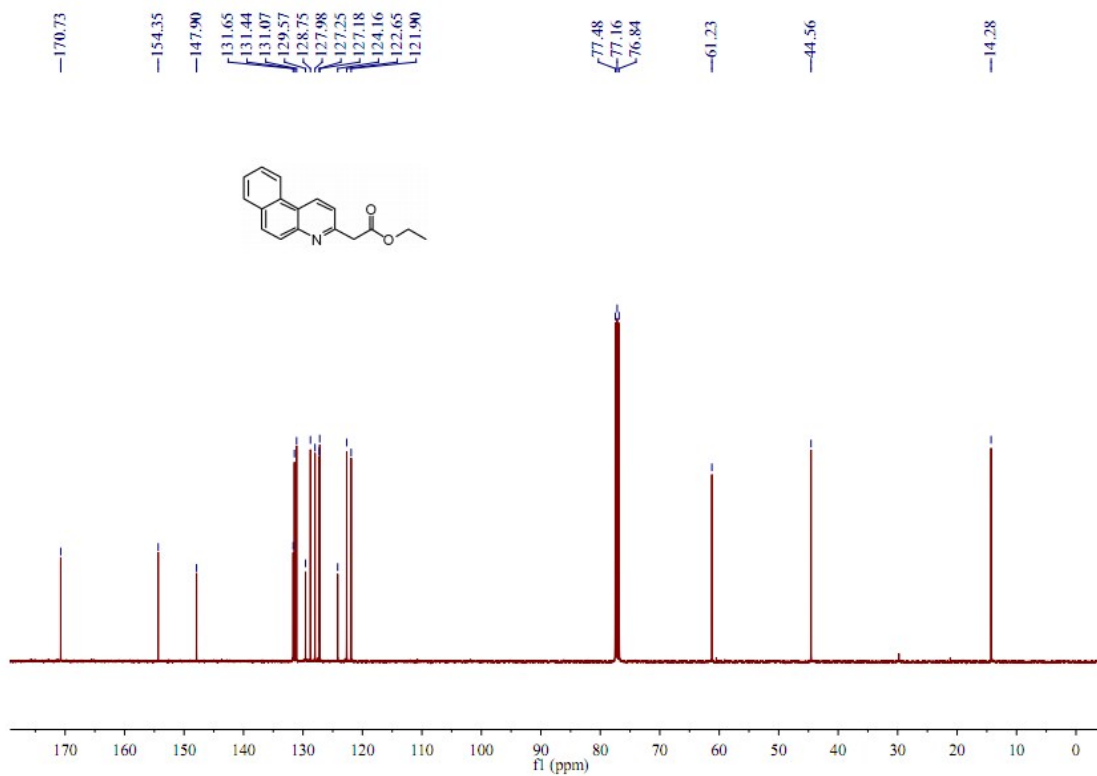

# Ethyl 1-benzoyl-2-phenylpyrrolo[1,2-a]quinoline-3-carboxylate. (3a)

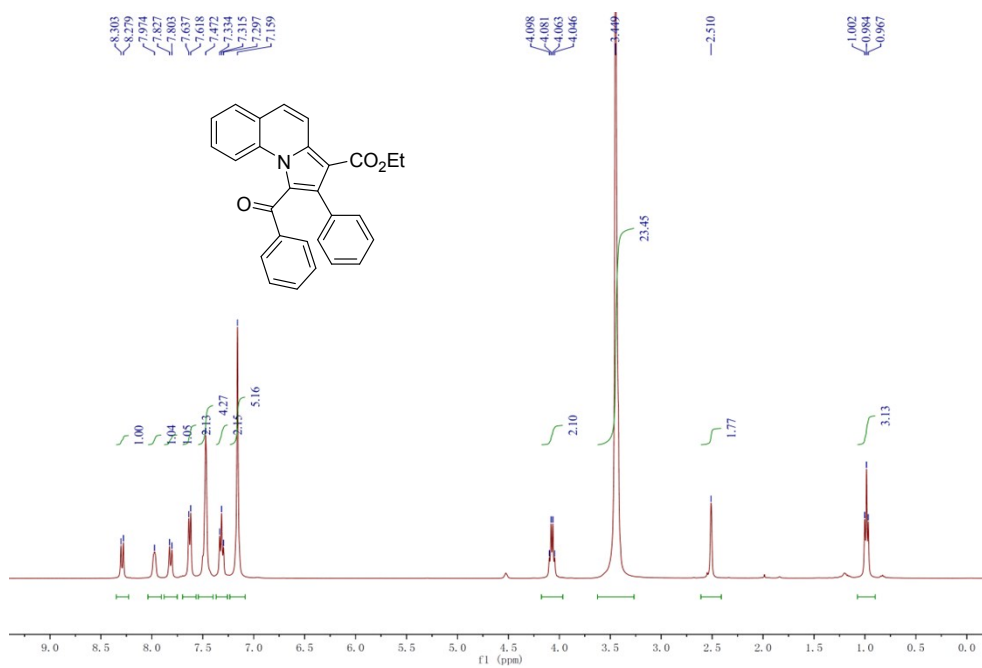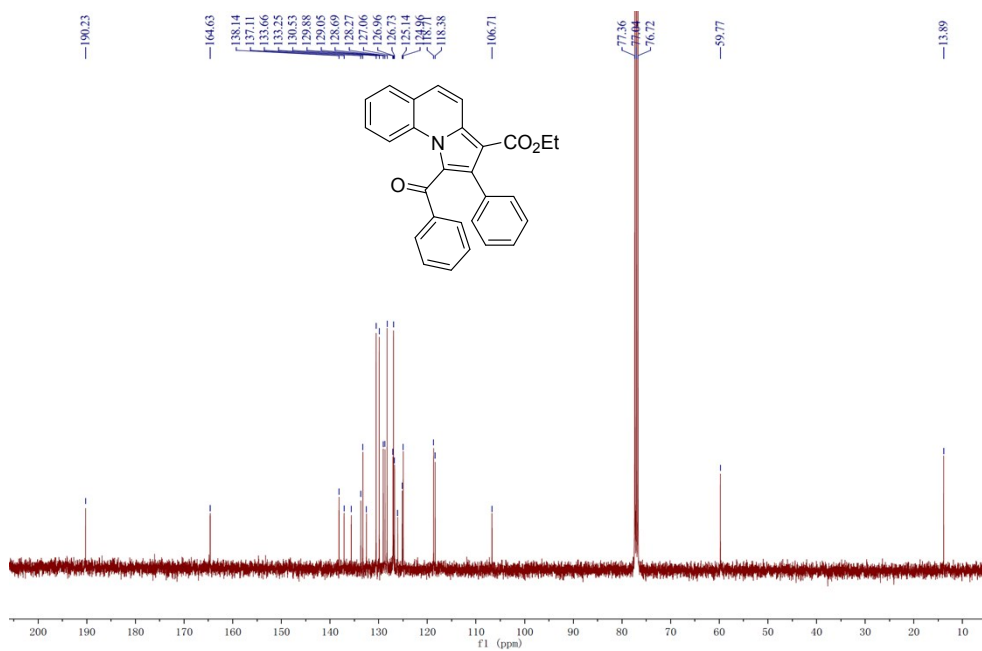

# Ethyl 1-benzoyl-2-(4-fluorophenyl)pyrrolo[1,2-a]quinoline-3-carboxylate (3b)

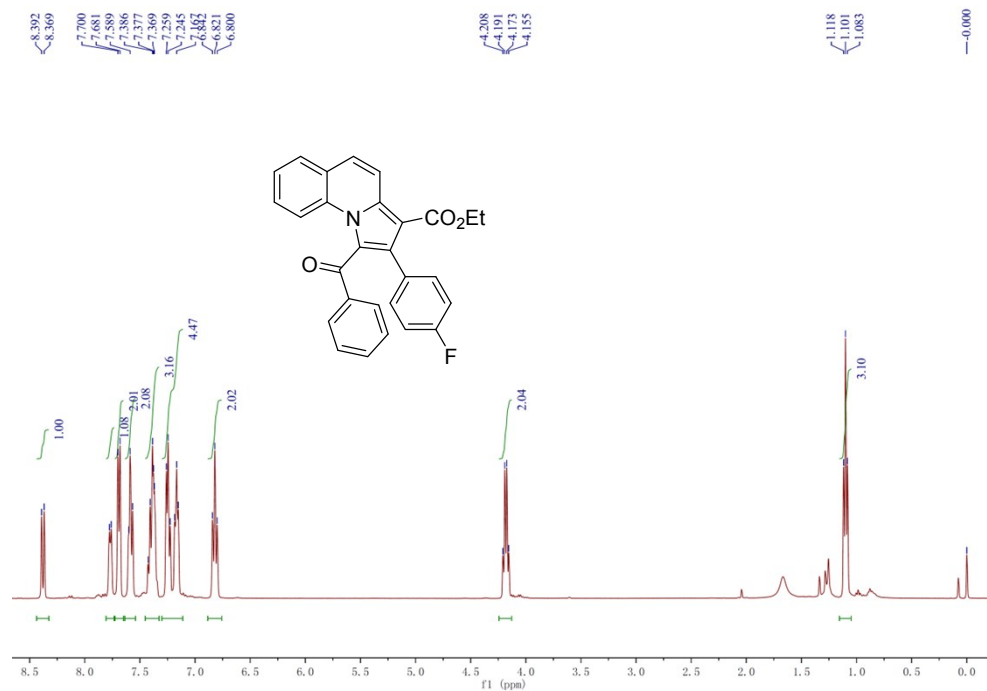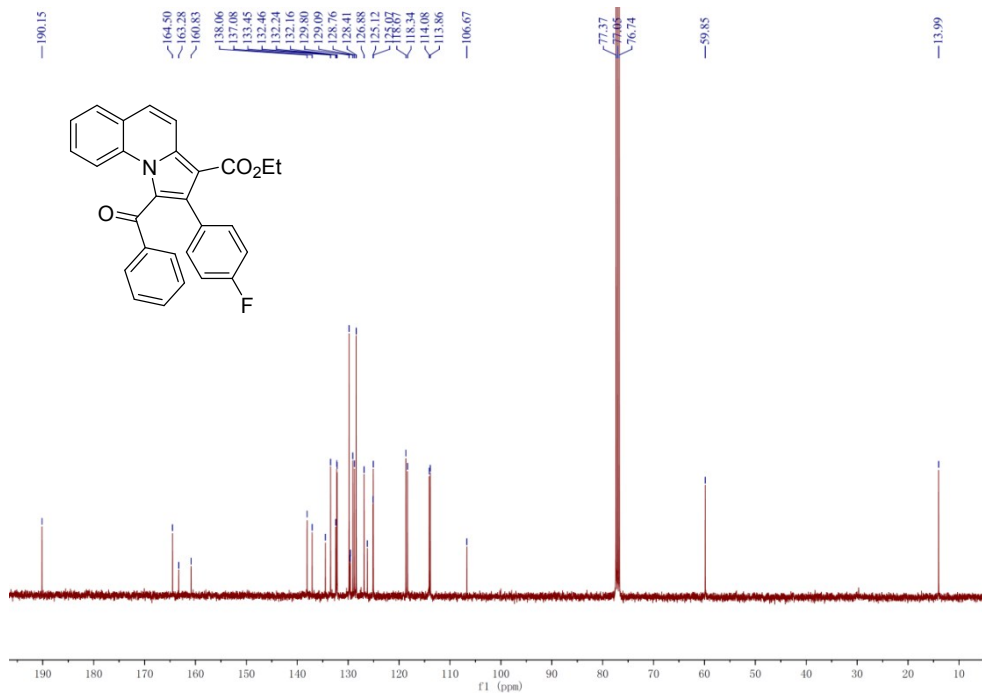

**Ethyl 1-benzoyl-2-(4-chlorophenyl)pyrrolo[1,2-a]quinoline-3-carboxylate (3c).**

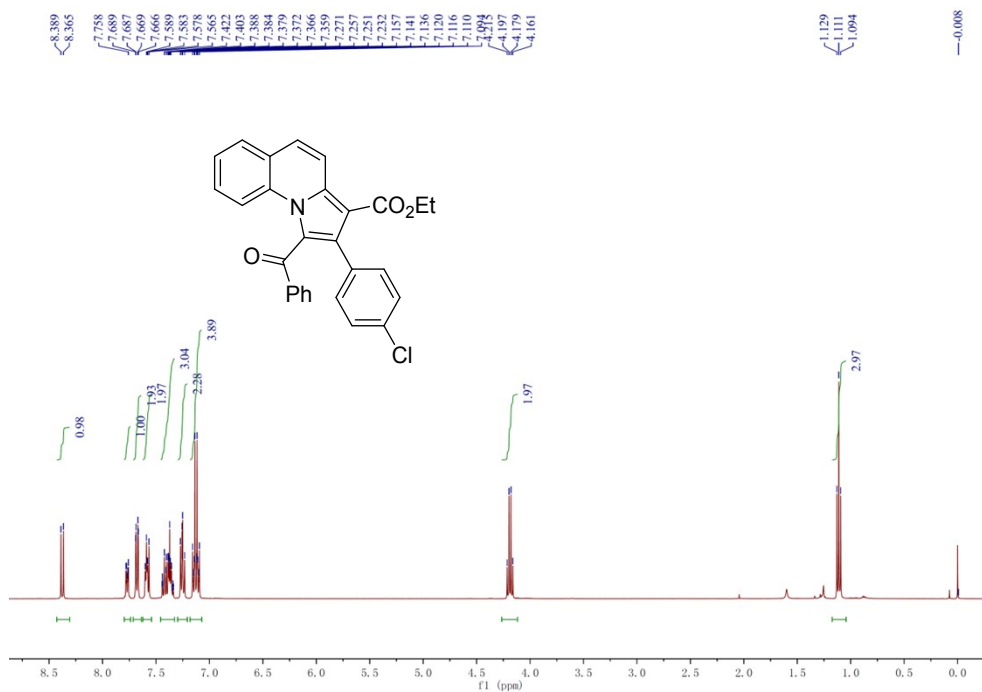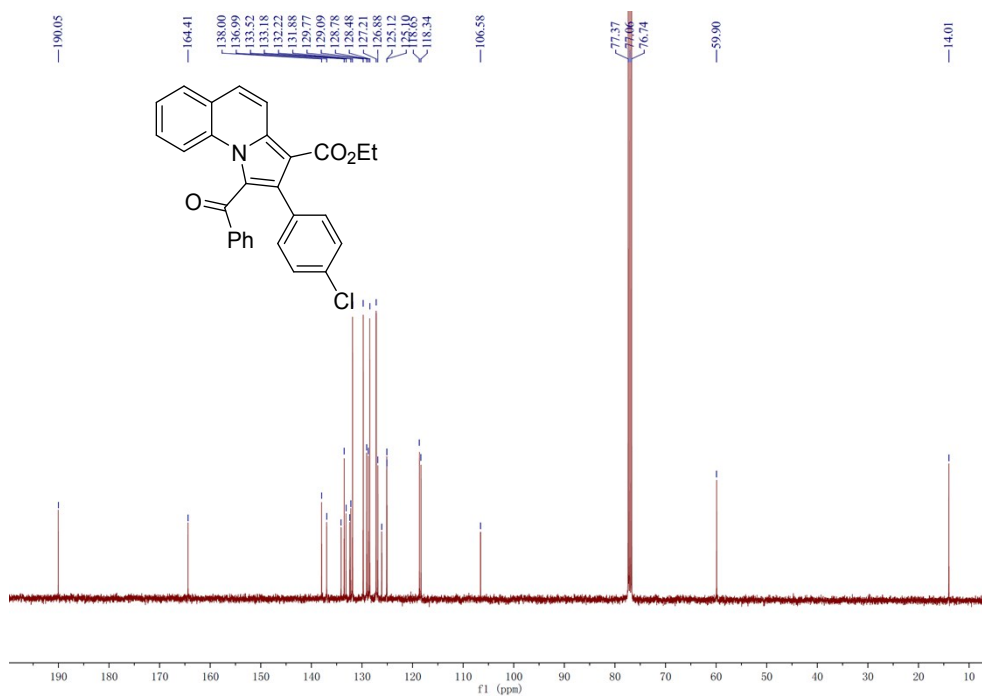

**Ethyl 1-(3-bromobenzoyl)-2-phenylpyrrolo[1,2-a]quinoline-3-carboxylate (3d).**

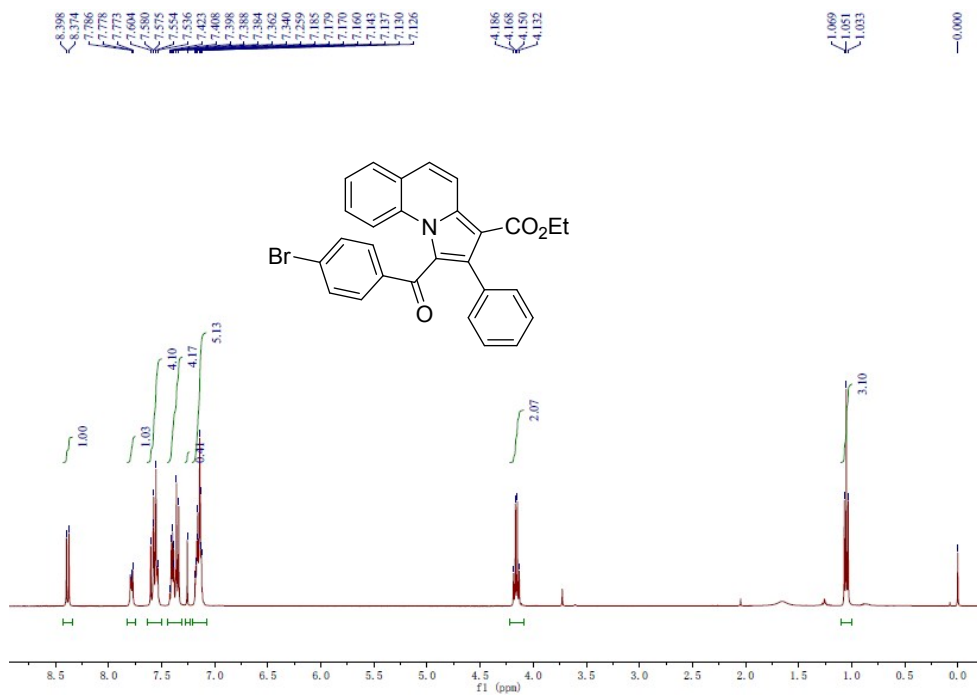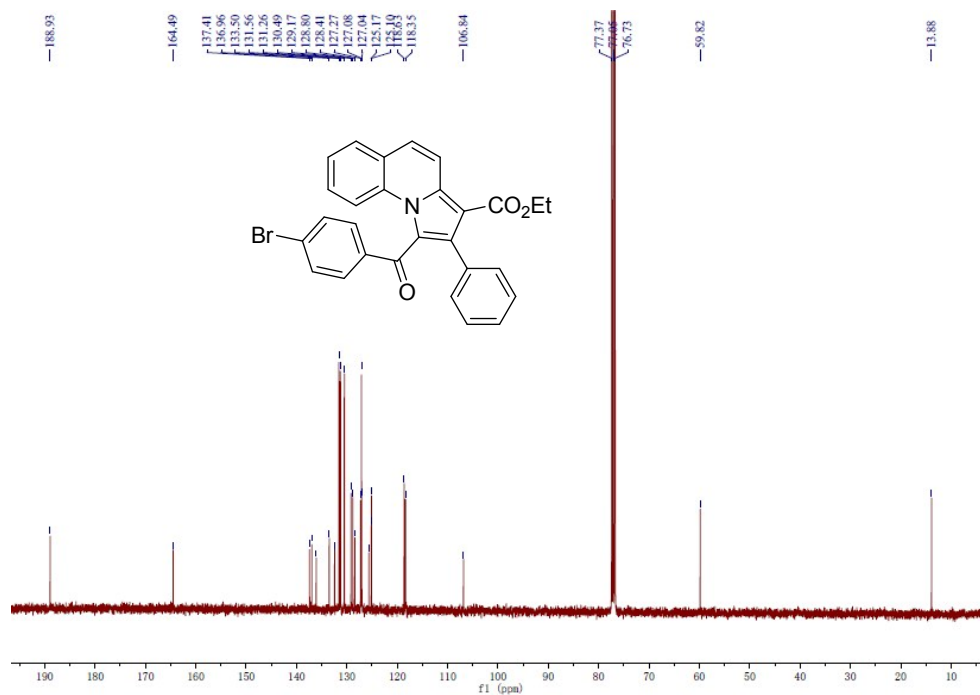

**Ethyl 1-benzoyl-2-(4-methoxyphenyl)pyrrolo[1,2-a]quinoline-3-carboxylate (3e).**

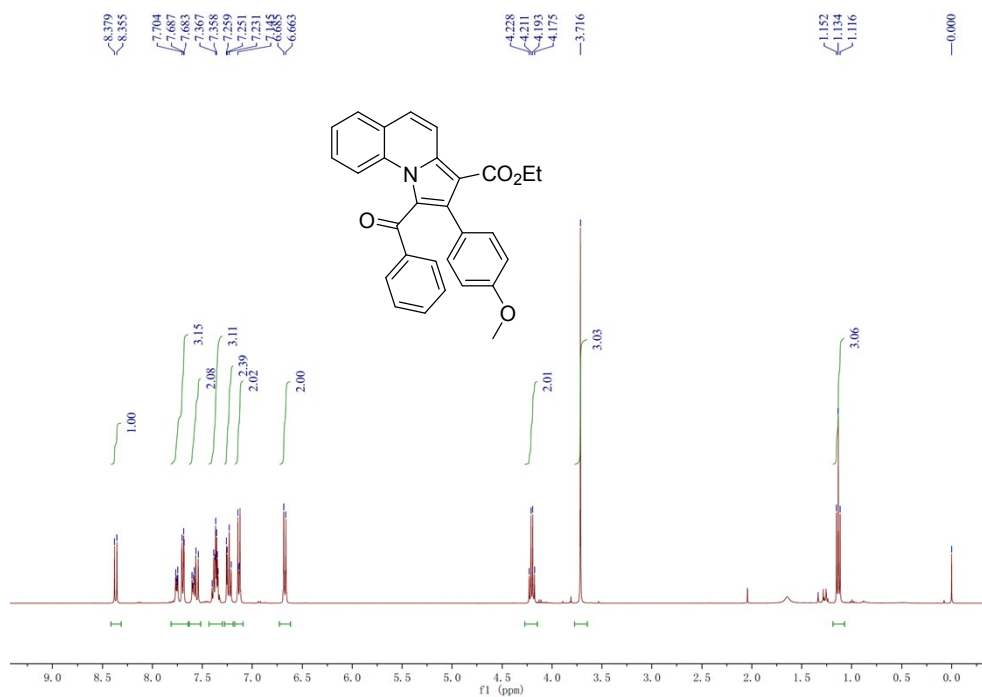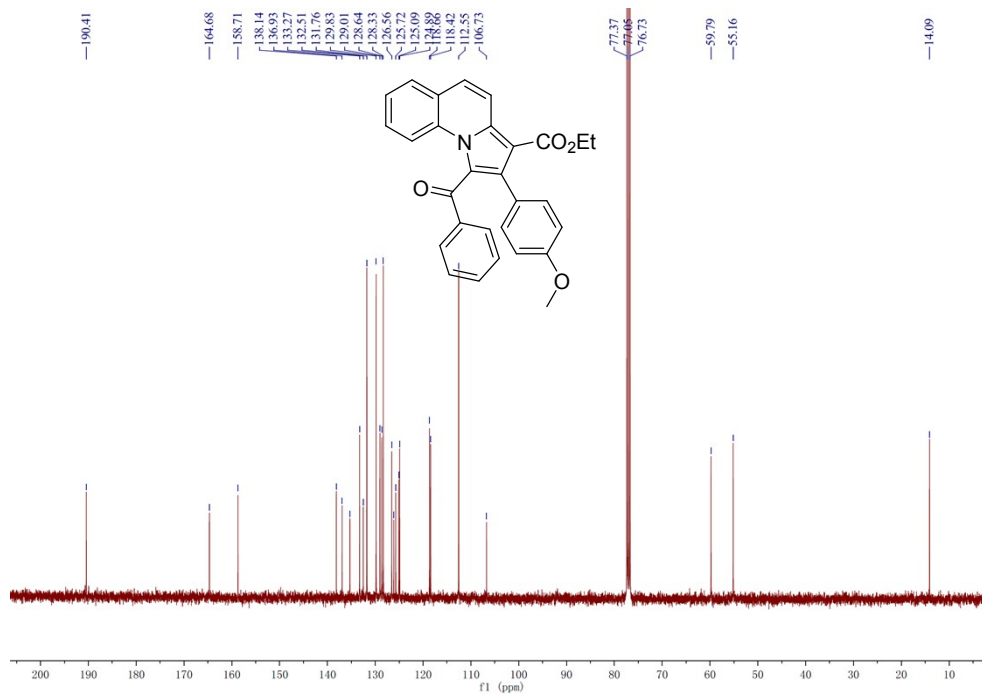

**Ethyl 1-benzoyl-2-(2-methoxyphenyl)pyrrolo[1,2-a]quinoline-3-carboxylate (3f) .**

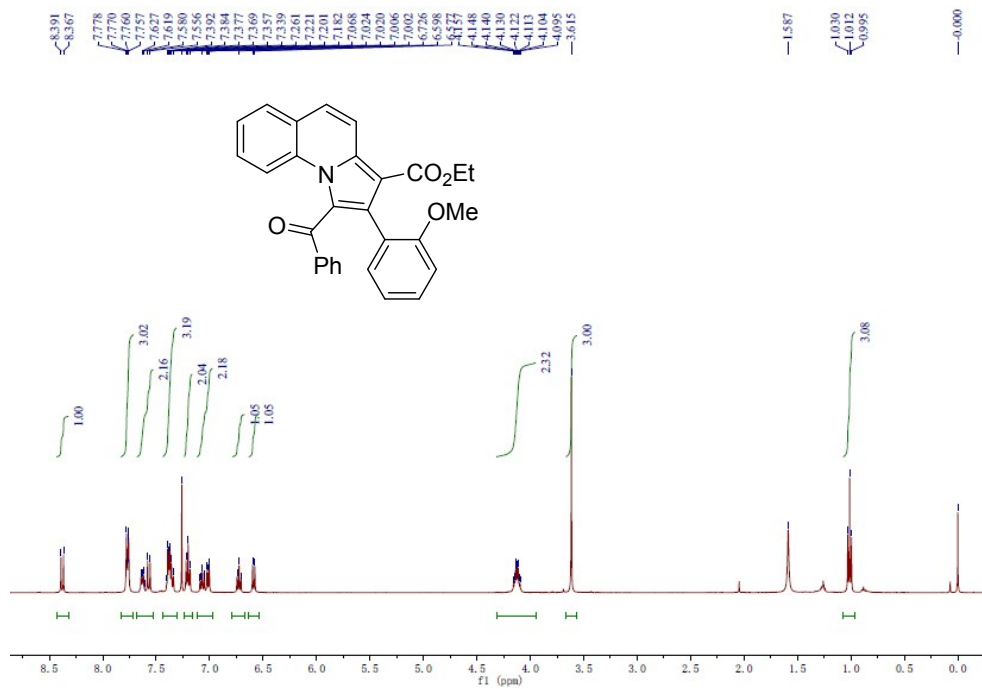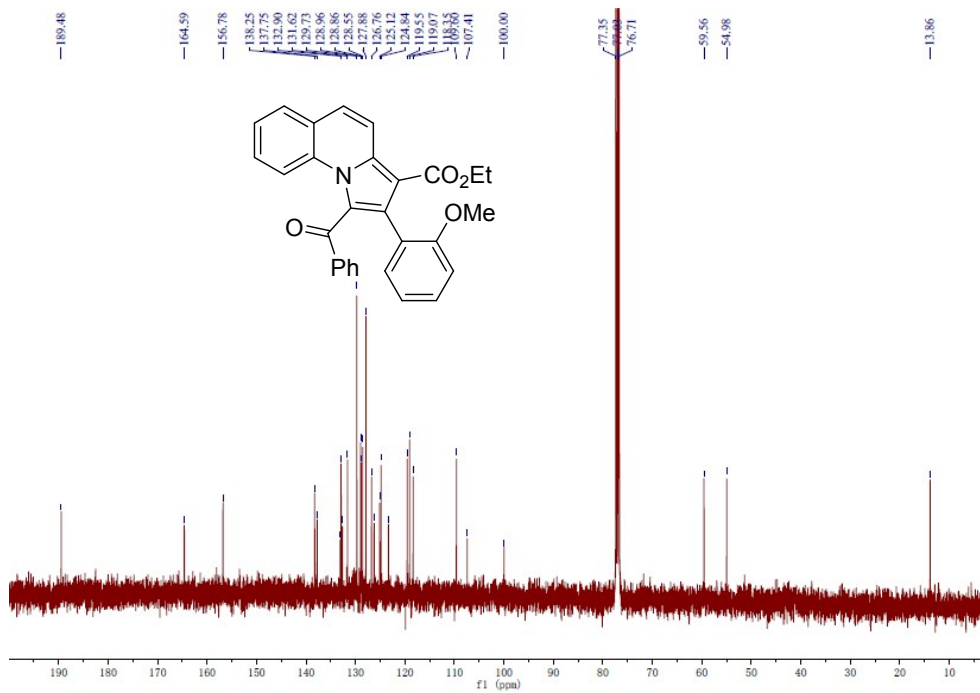



### Ethyl 1-benzoyl-7-bromo-2-phenylpyrrolo[1,2-a]quinoline-3-carboxylate (3g).

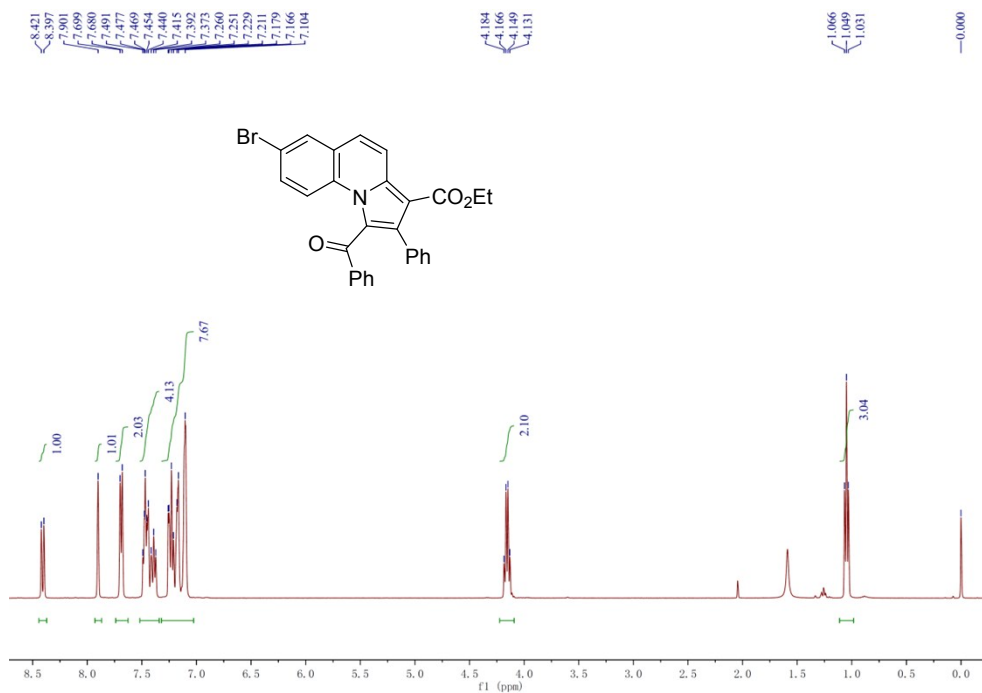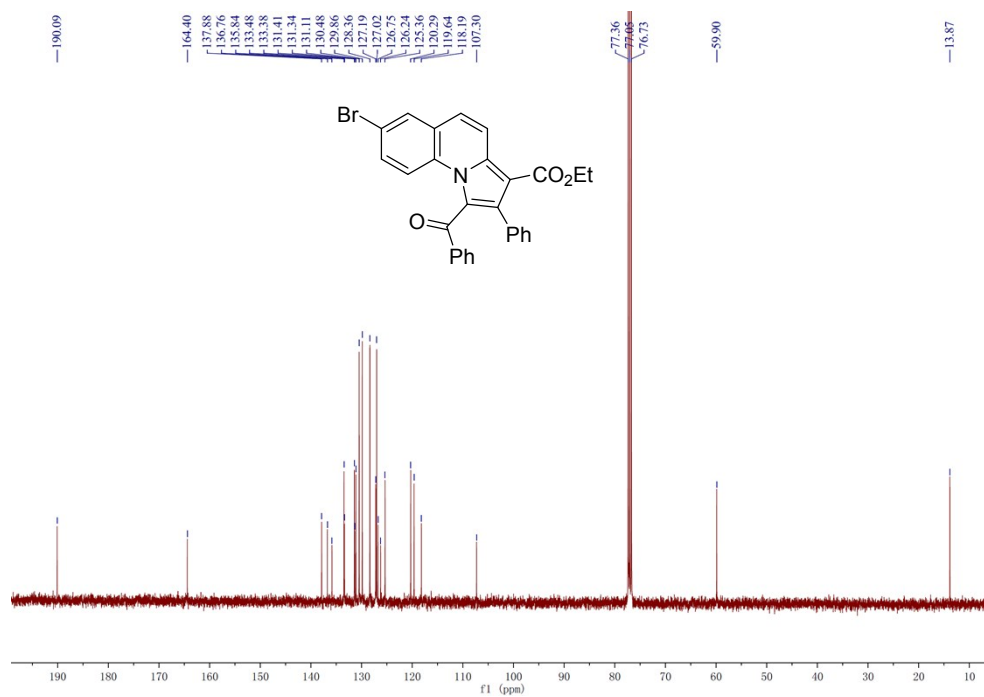

**Ethyl 1-benzoyl-7-methyl-2-phenylpyrrolo[1,2-a]quinoline-3-carboxylate (3h).**

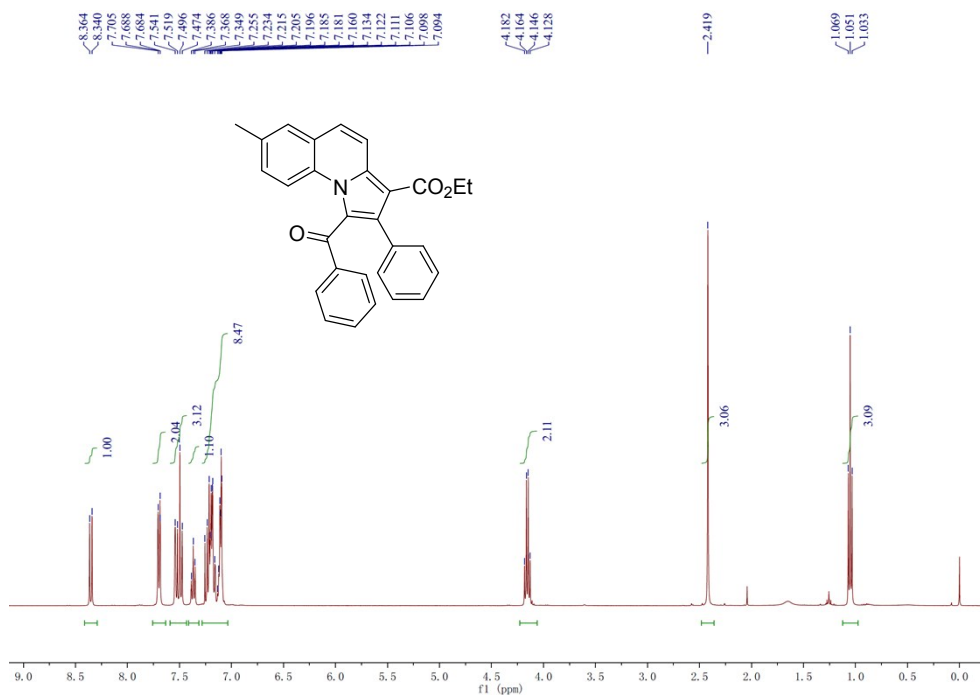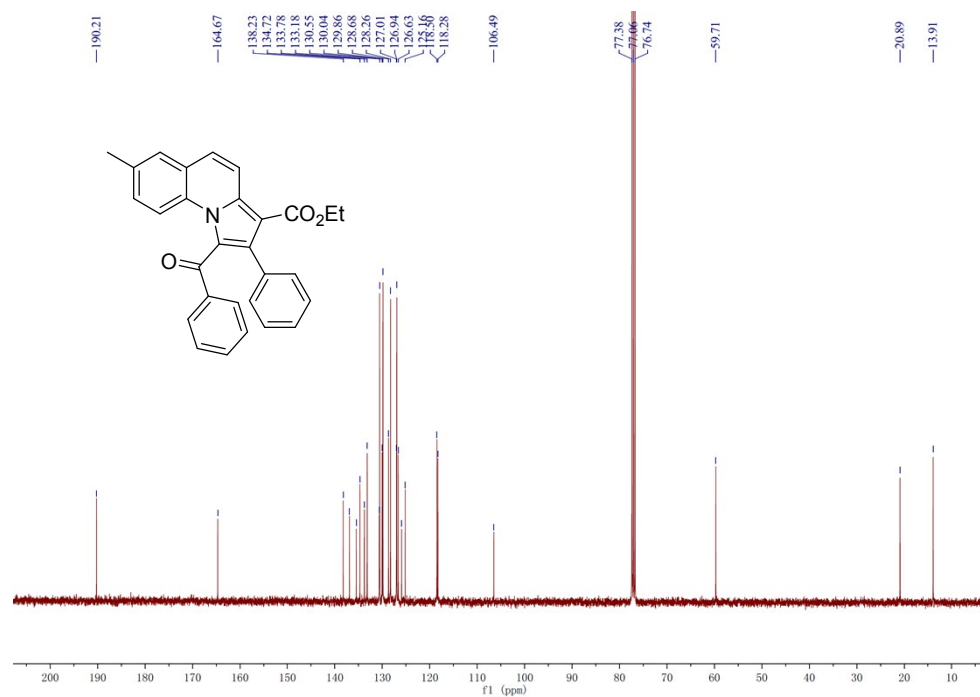

**Ethyl 1-benzoyl-8-chloro-2-phenylpyrrolo[1,2-a]quinoline-3-carboxylate (3i).**

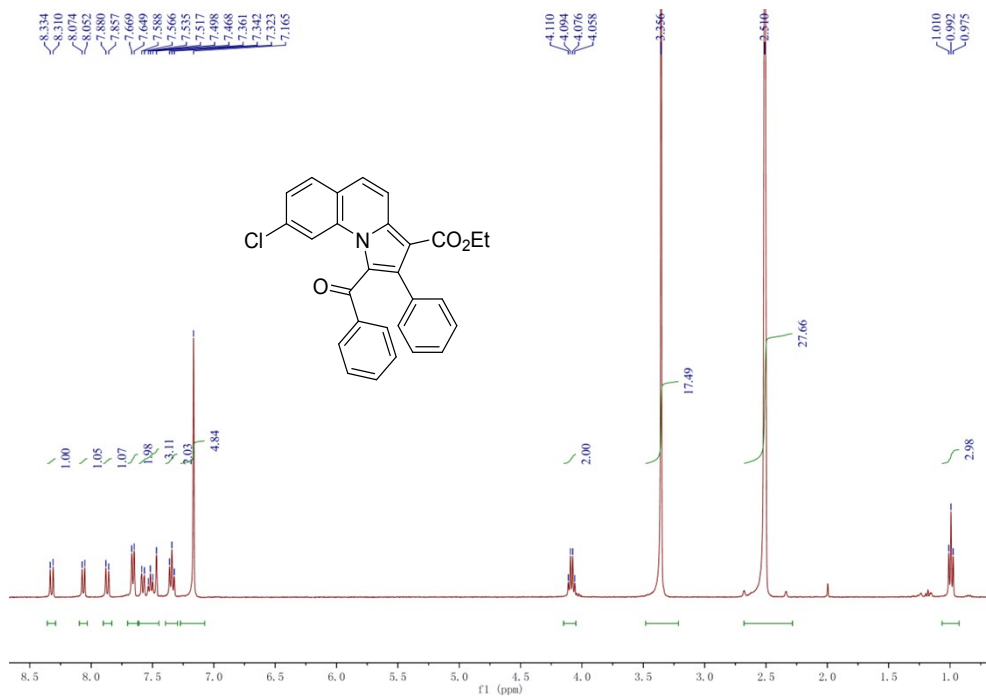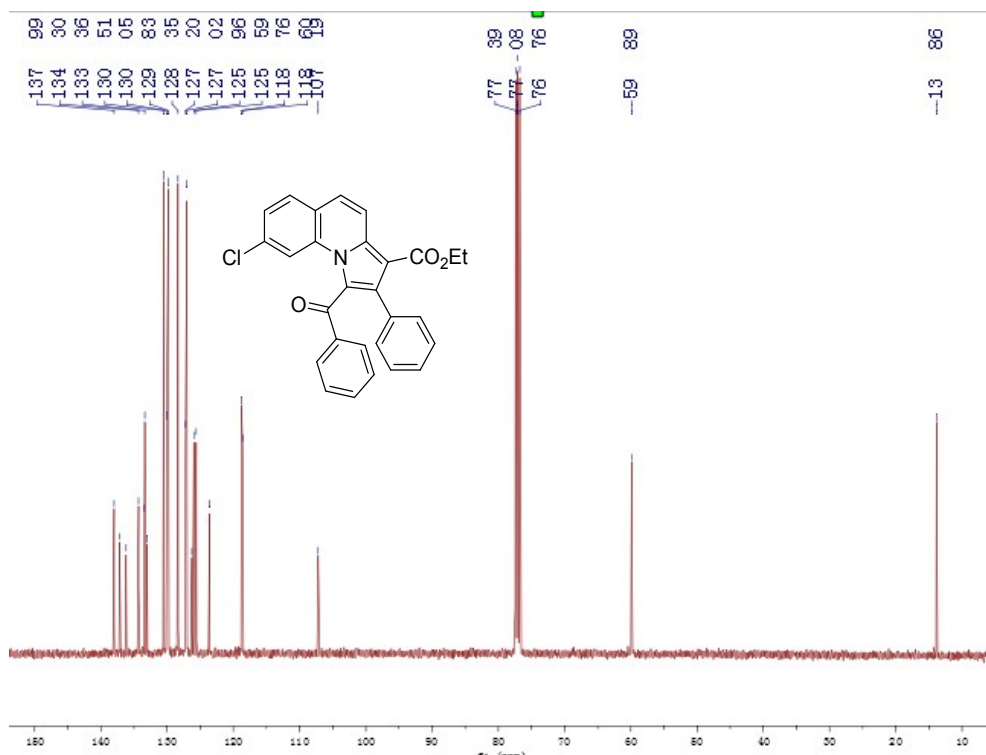

**Ethyl 1-benzoyl-2-(4-methoxyphenyl)-7-methylpyrrolo[1,2-a]quinoline-3-Carboxylate (3j).**

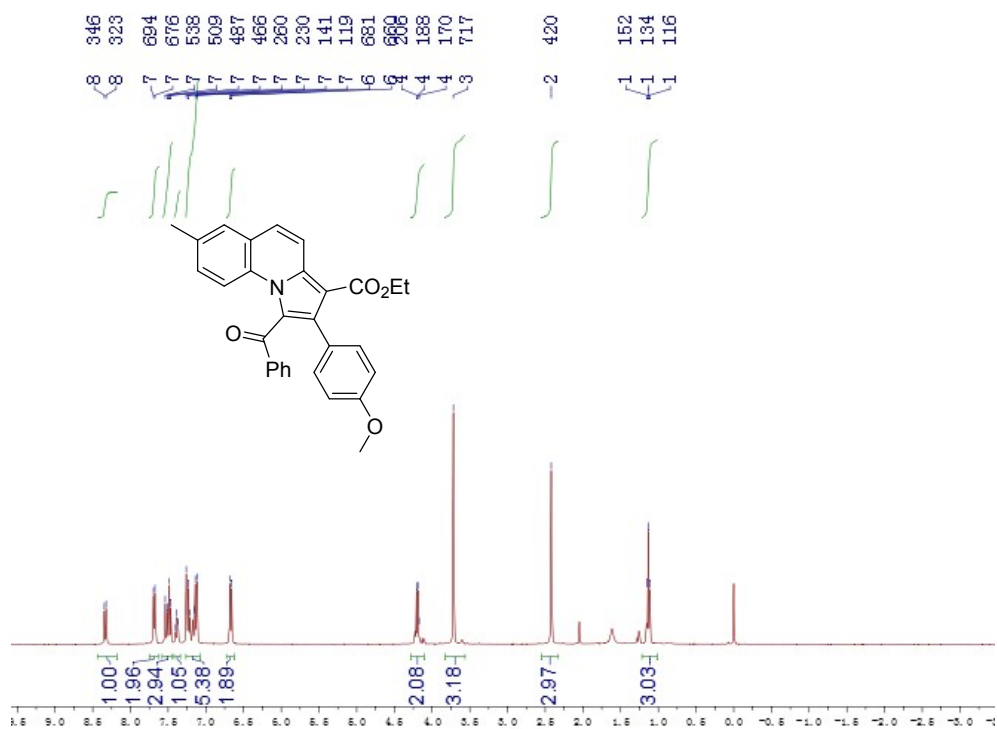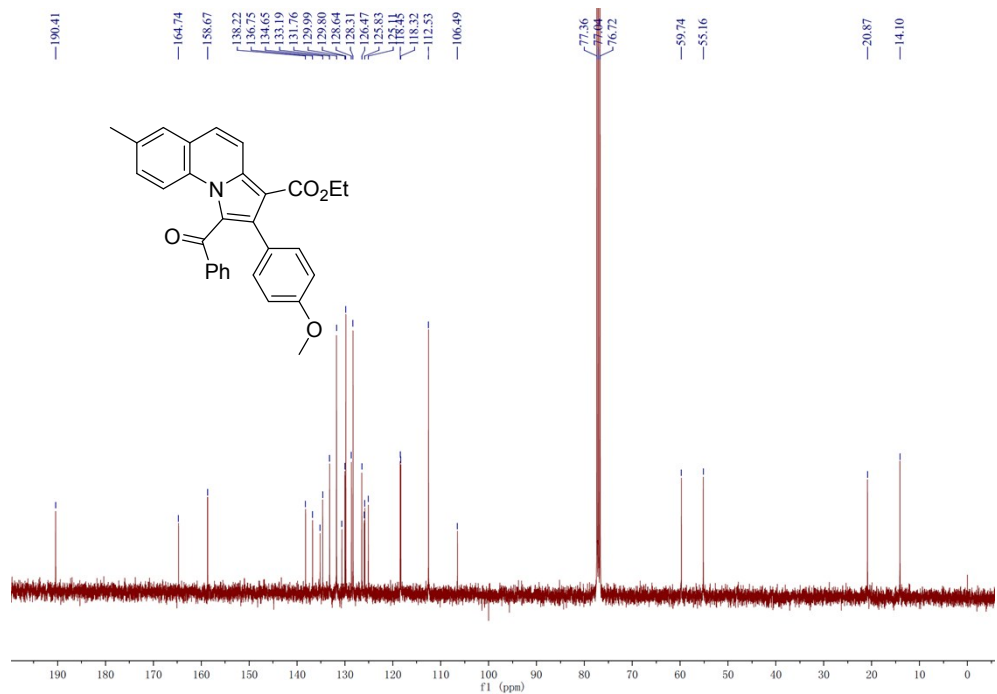

**Ethyl 2-(thiophen-2-yl)-1-(thiophene-2-carbonyl)pyrrolo[1,2-a]quinoline-3-carboxylate (3k).**

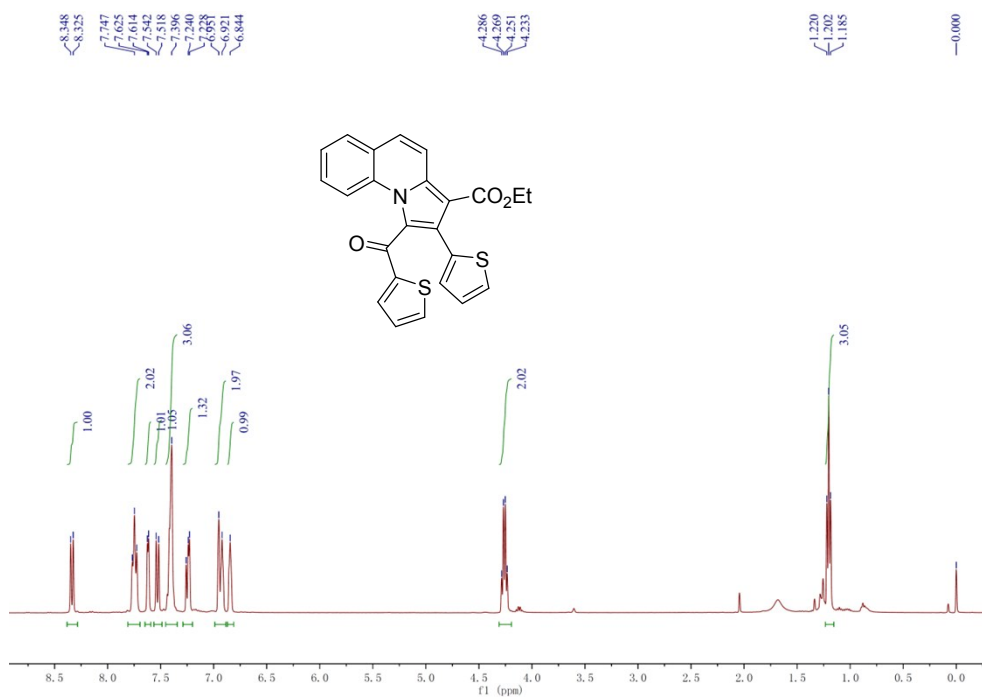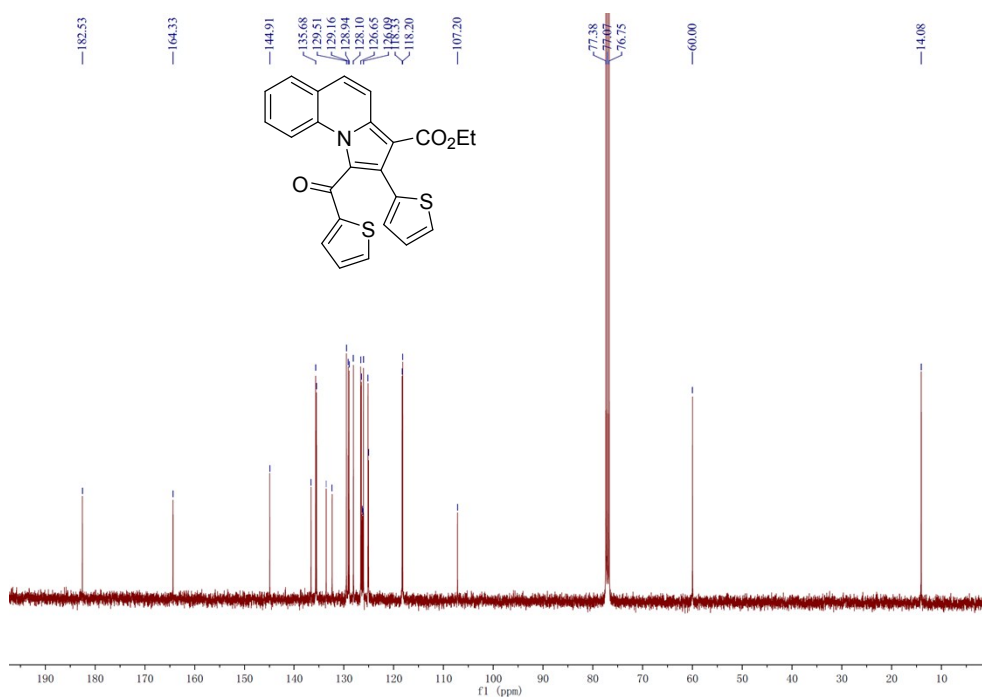

**Ethyl 3-benzoyl-2-phenylbenzo[f]pyrrolo[1,2-a]quinoline-1-carboxylate (31).**

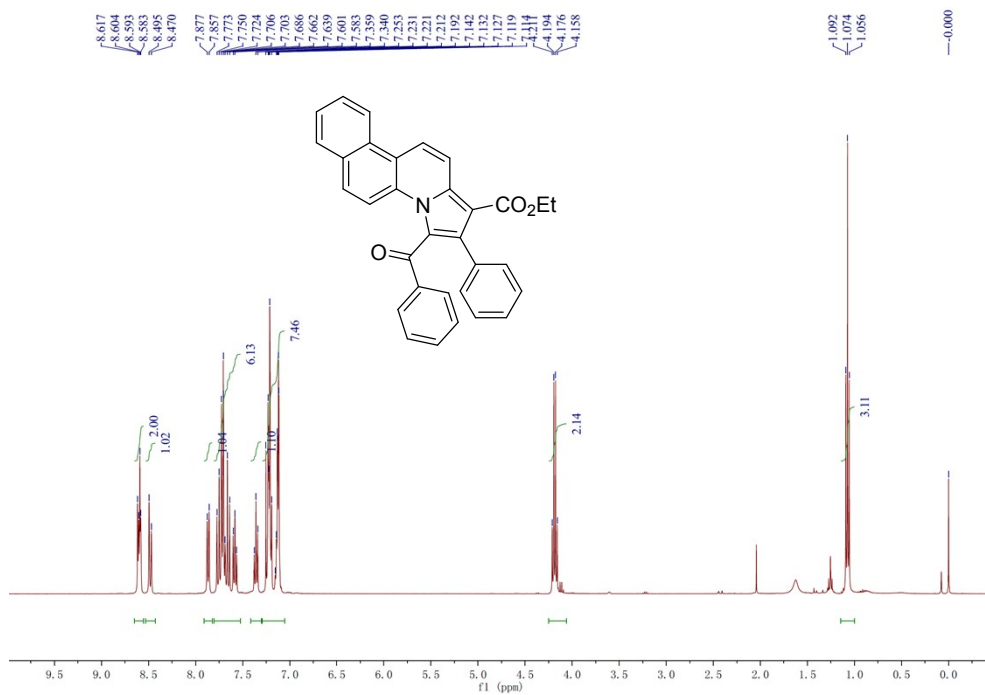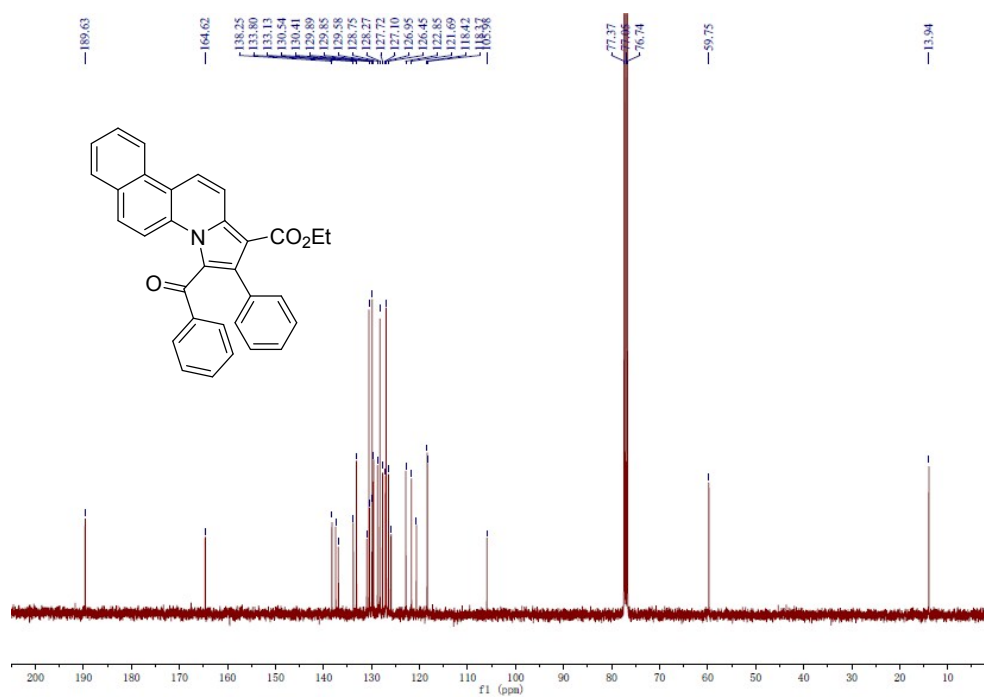

# Ethyl 3-benzoyl-2-phenylpyrrolo[2,1-a]isoquinoline-1-carboxylate (5a).

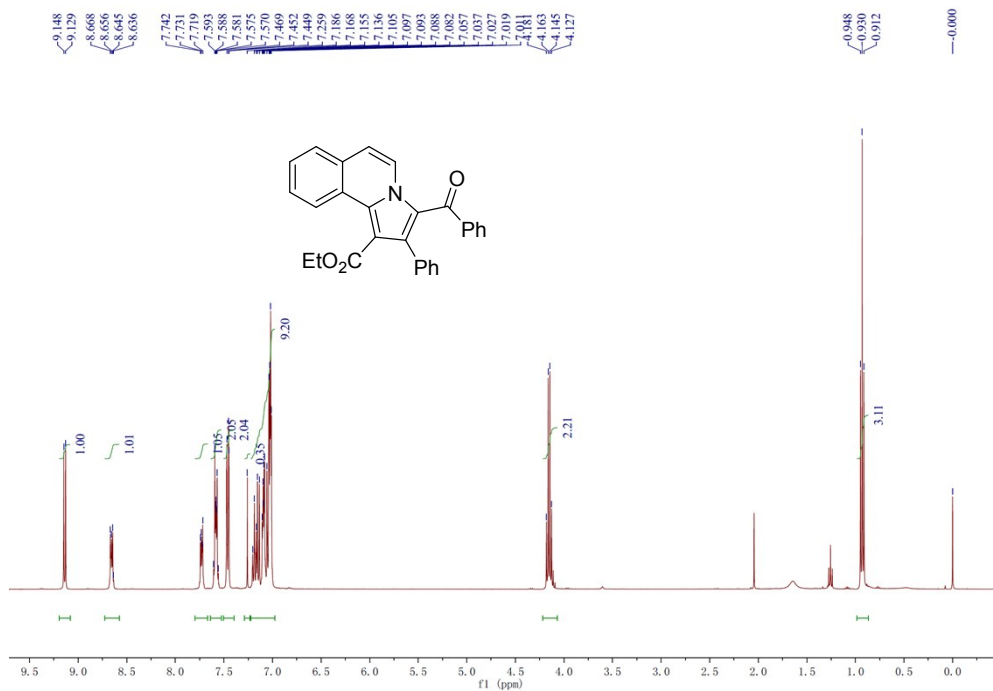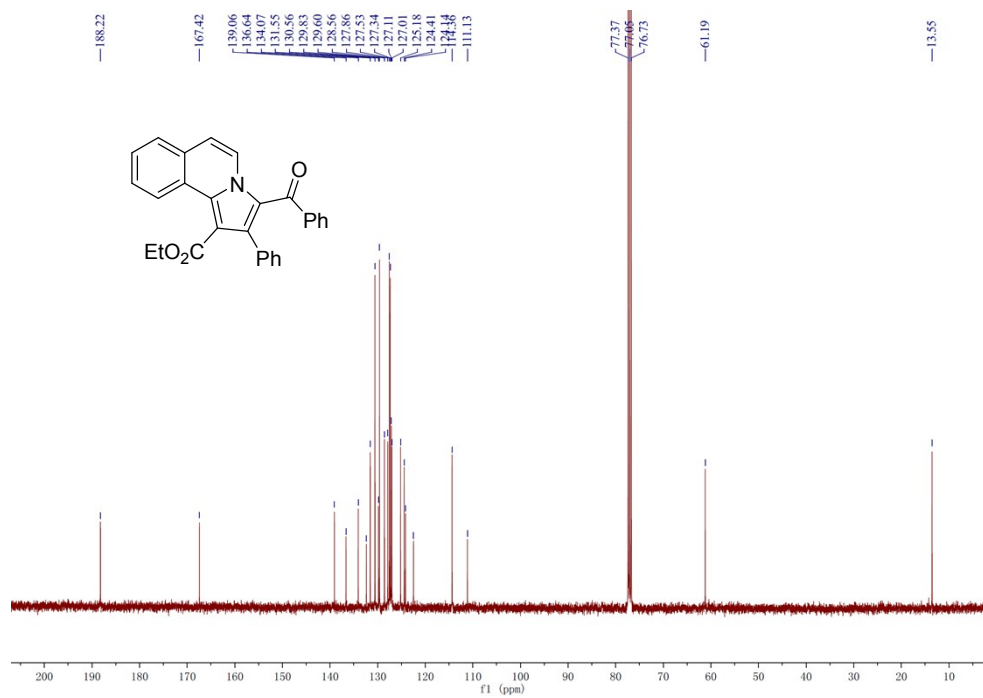

**Ethyl 3-benzoyl-2-(4-chlorophenyl)pyrrolo[2,1-a]isoquinoline-1-carboxylate (5b).**

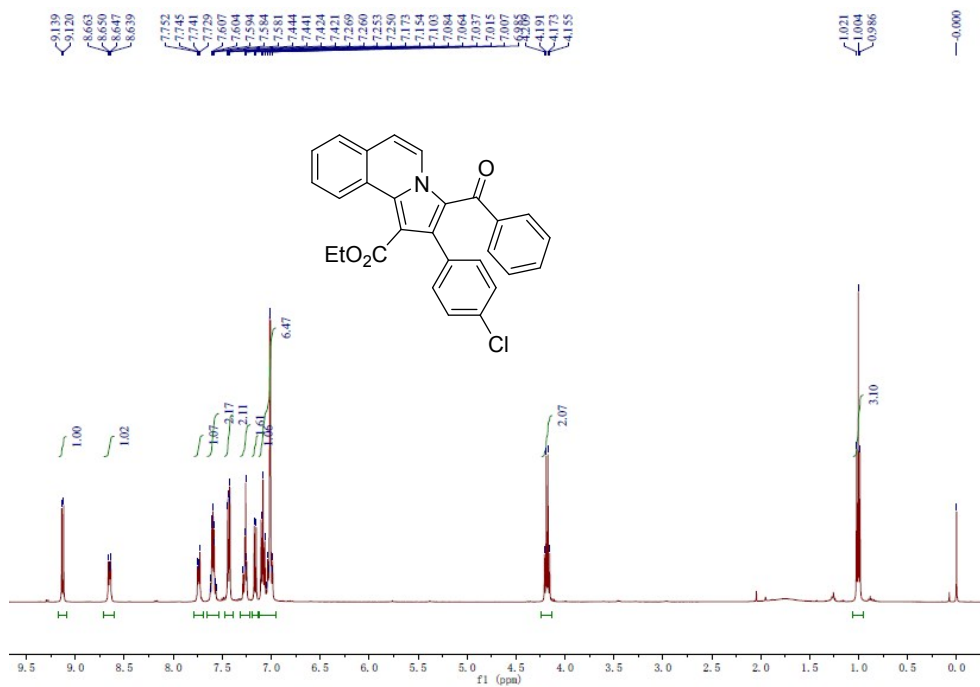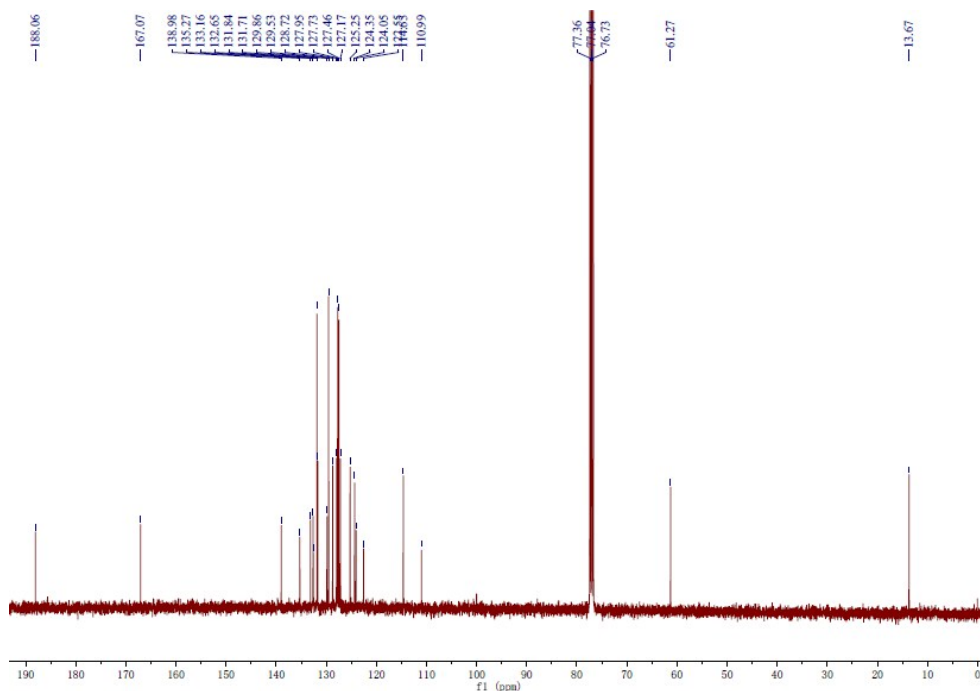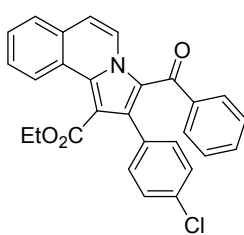



**Ethyl 3-benzoyl-2-(p-tolyl)pyrrolo[2,1-a]isoquinoline-1-carboxylate (5c).**

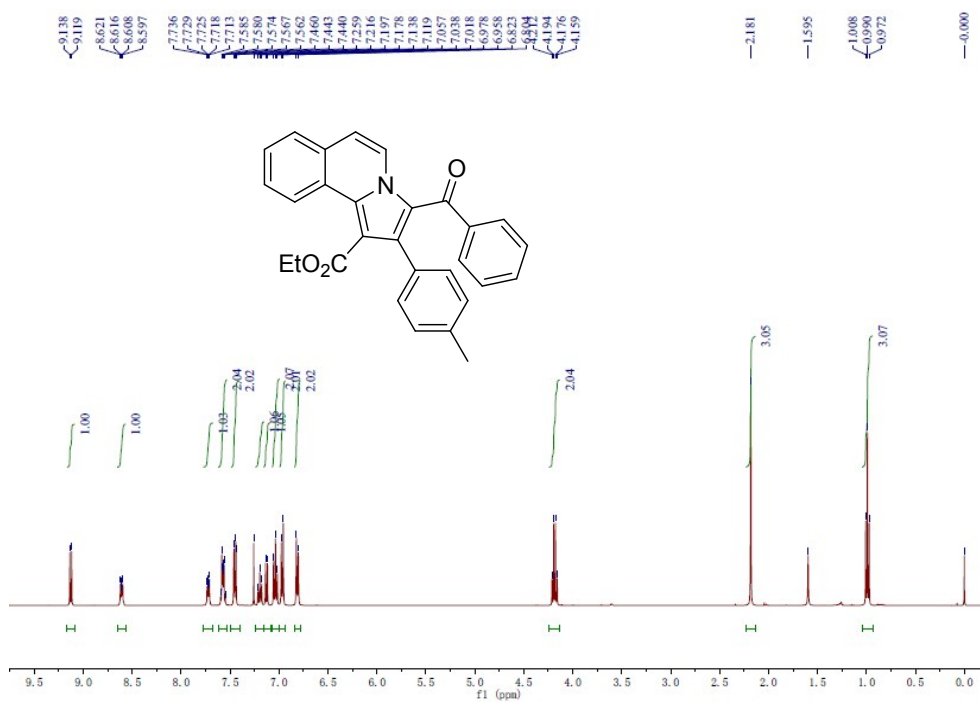

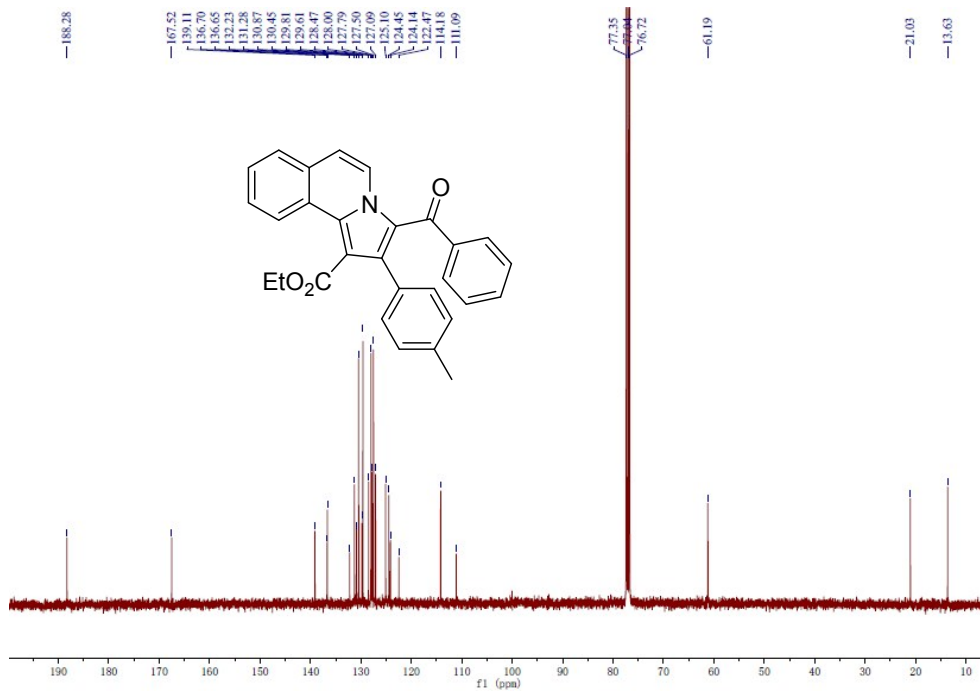

**Ethyl 3-benzoyl-2-phenylindolizine-1-carboxylate (5d).**

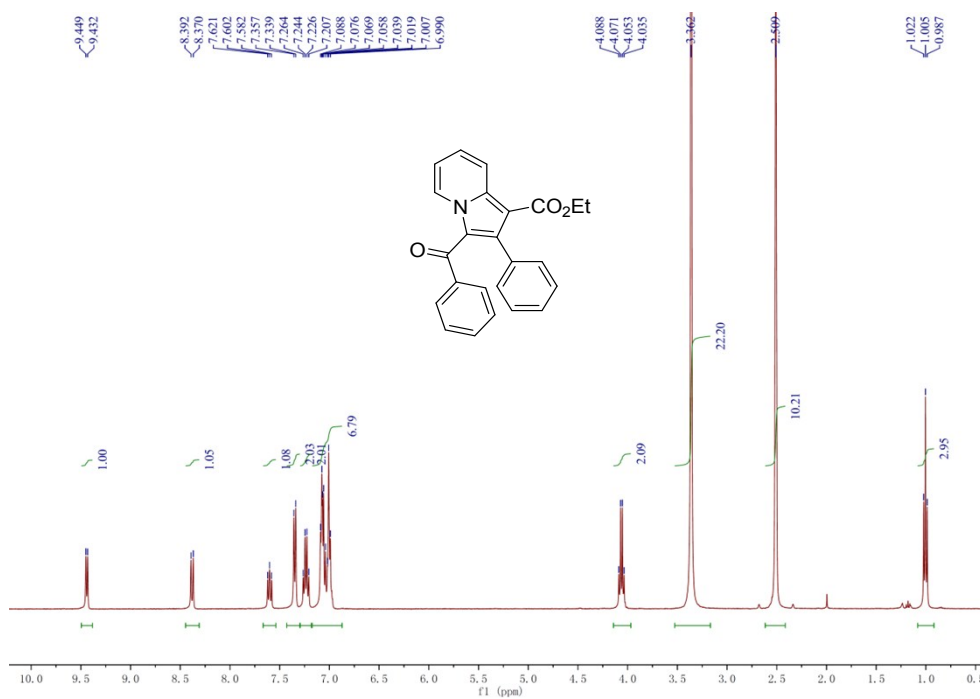

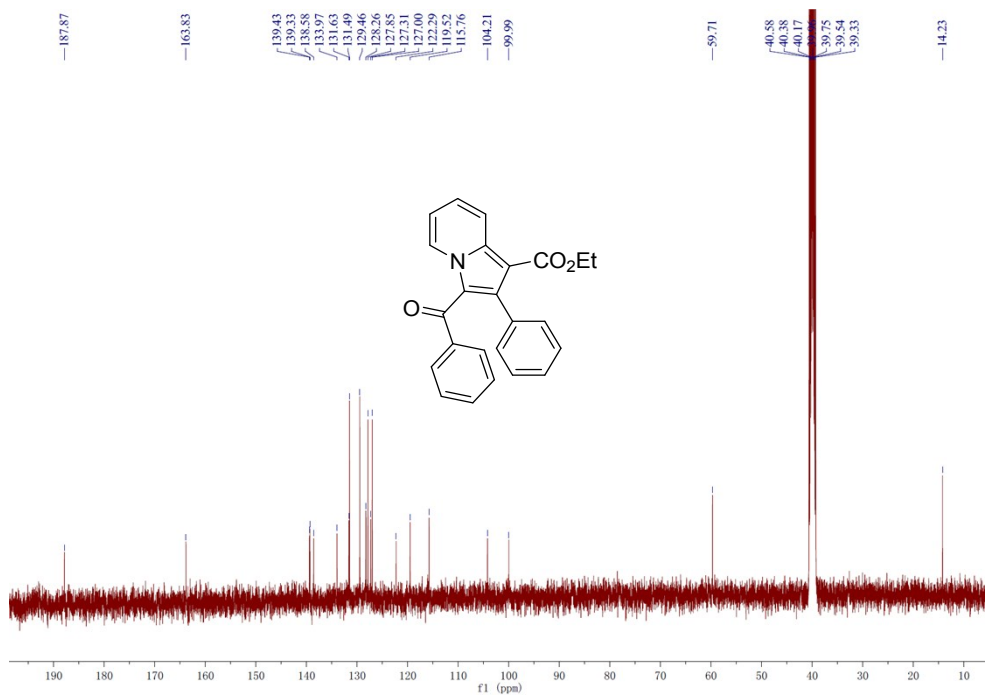

**Ethyl 3-benzoyl-2-(4-(trifluoromethyl)phenyl)indolizine-1-carboxylate (5e).**

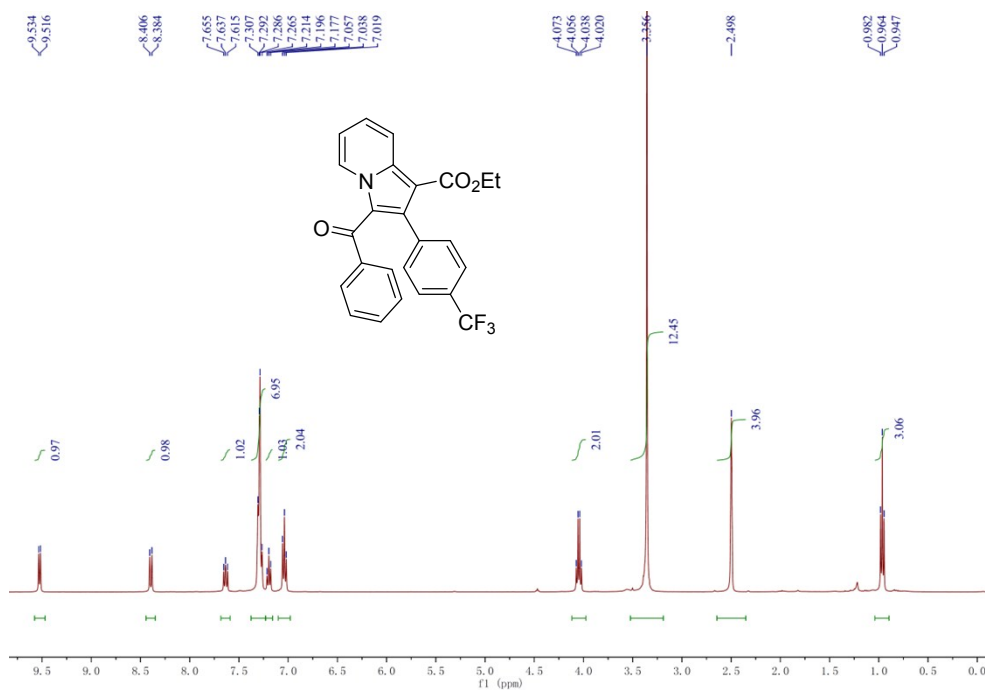

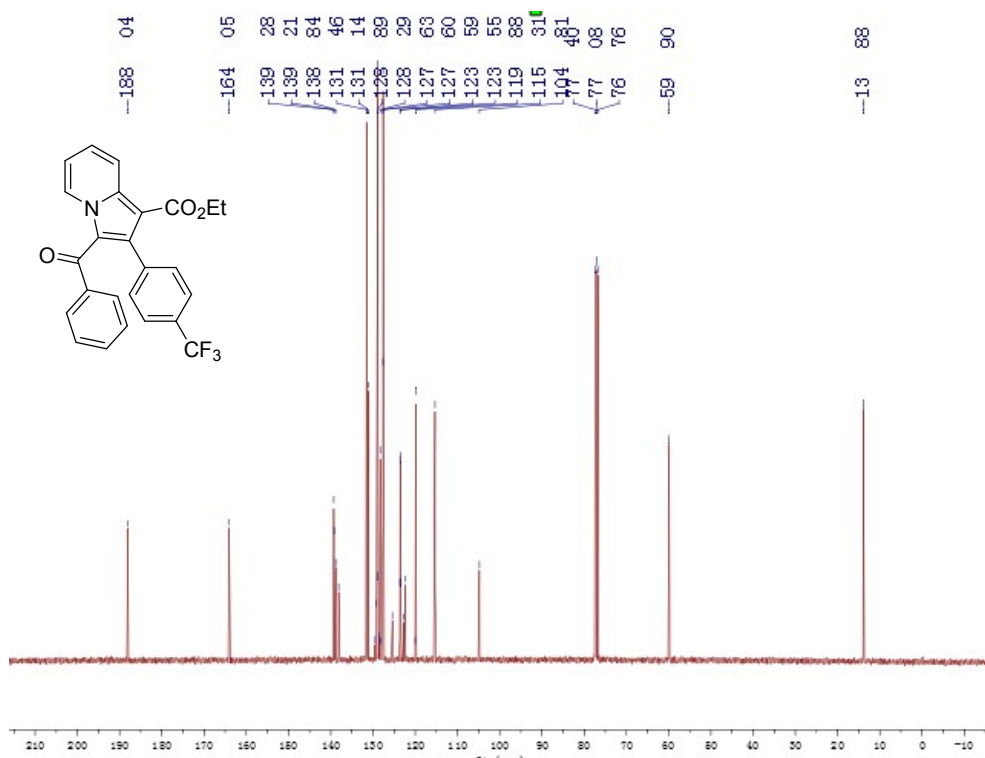

**Ethyl 3-benzoyl-2-(4-chlorophenyl)indolizine-1-carboxylate (5f).**

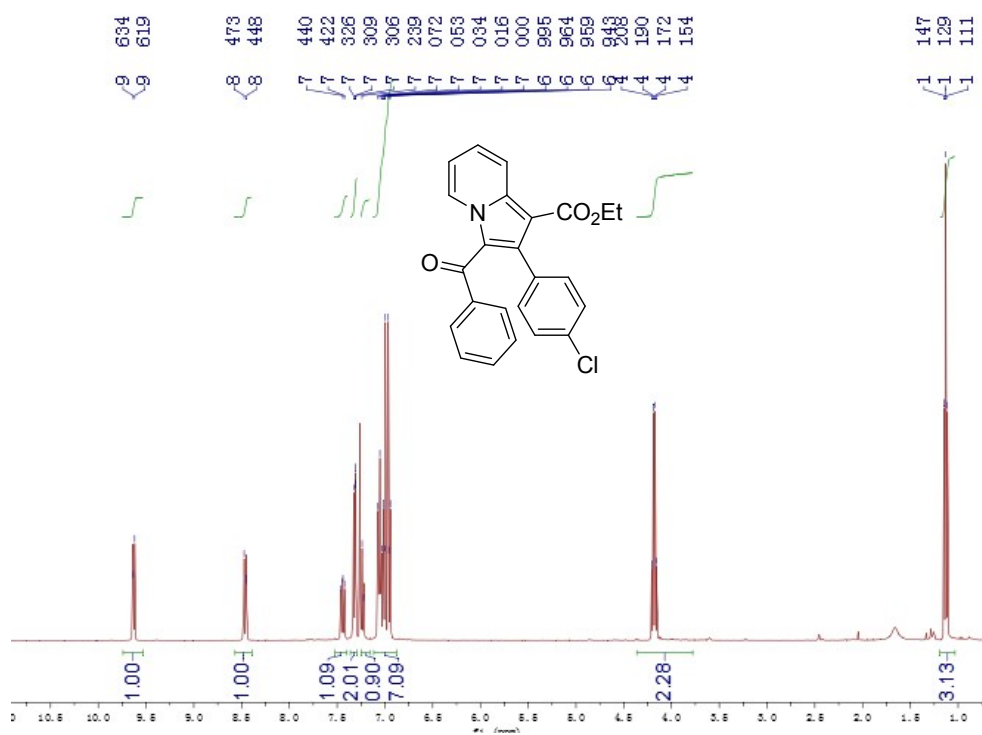

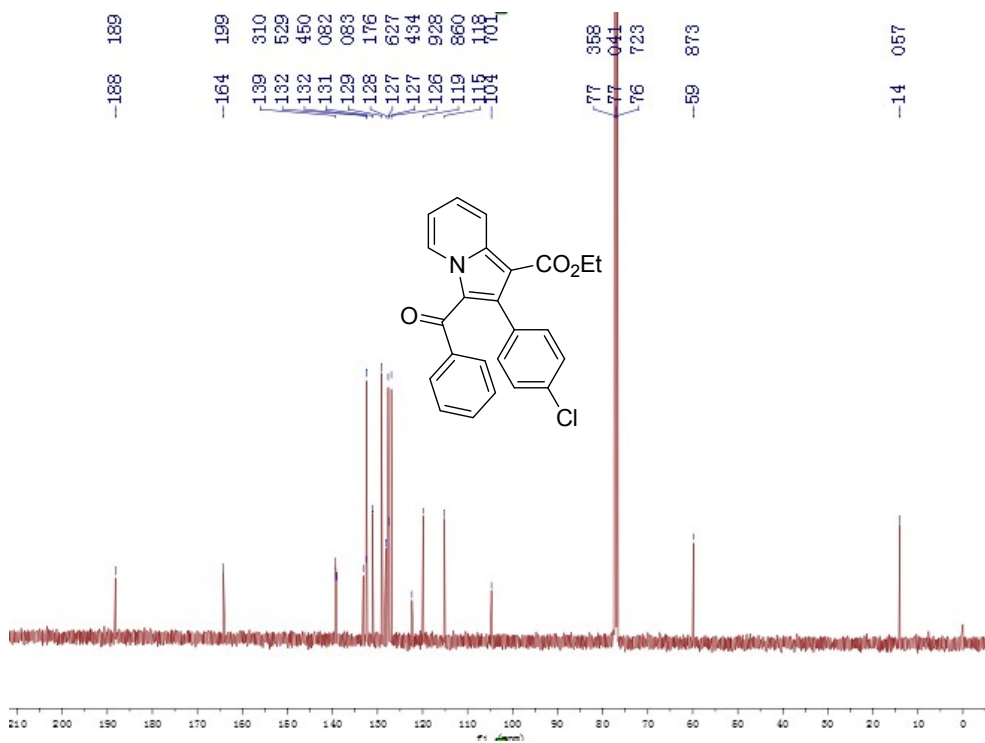

**Ethyl 3-benzoyl-2-(p-tolyl)indolizine-1-carboxylate (5g).**

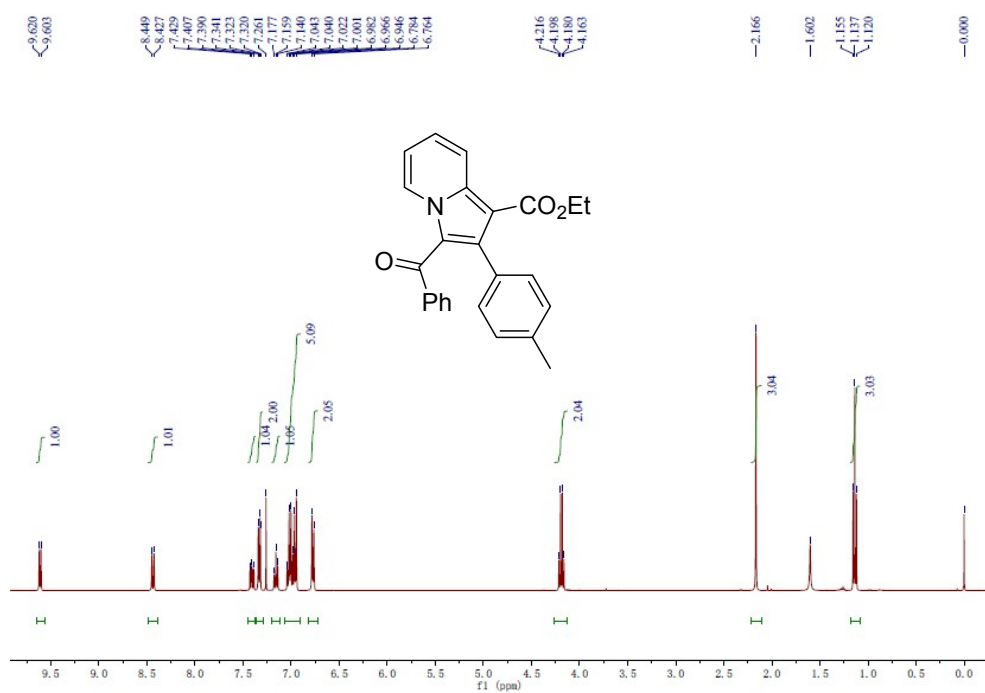

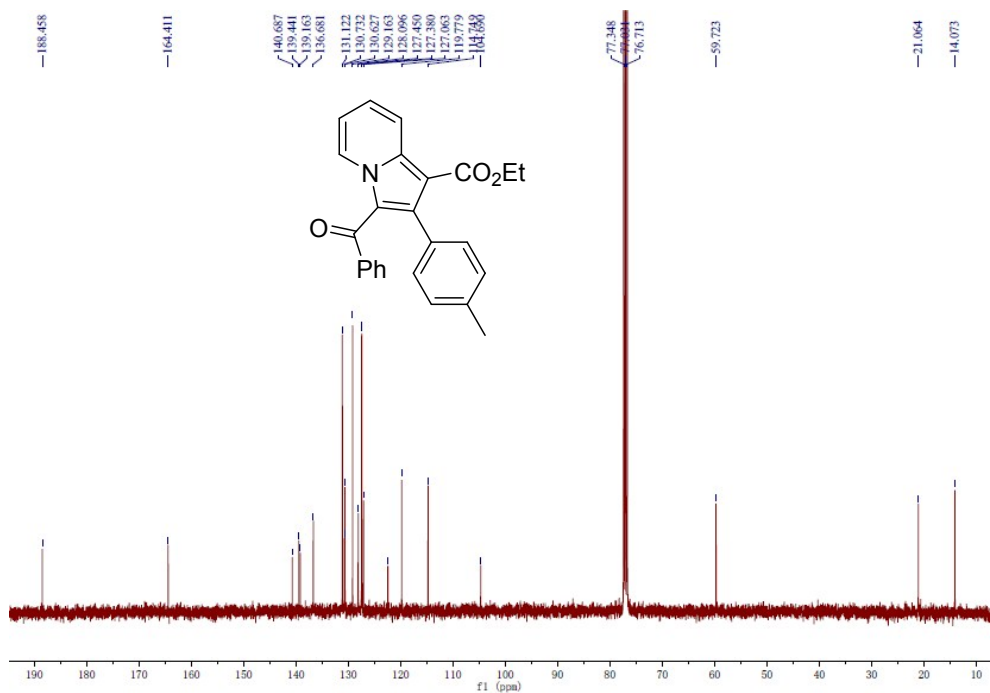

**Ethyl 3-benzoyl-2-(2-methoxyphenyl)indolizine-1-carboxylate (5h).**

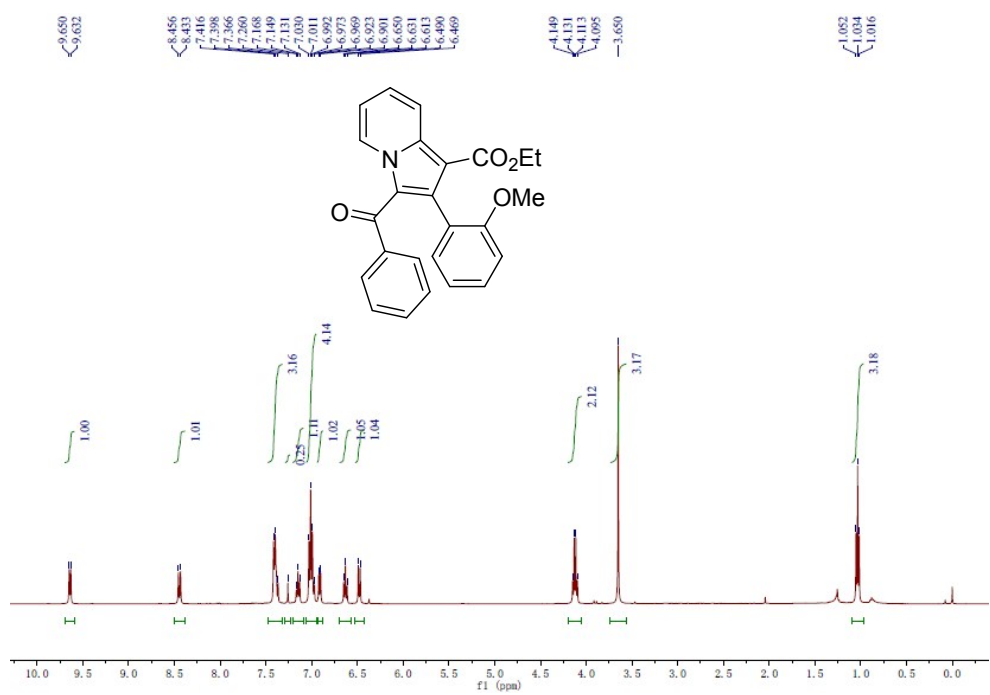

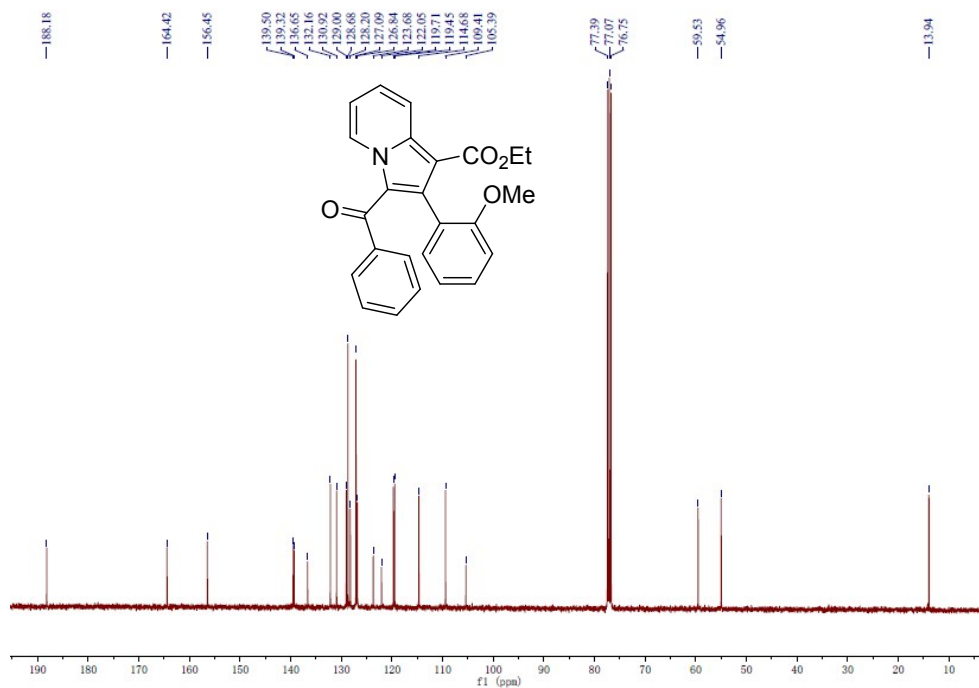

### 6H-chromeno[3,4-a]indolizin-6-one (6h)

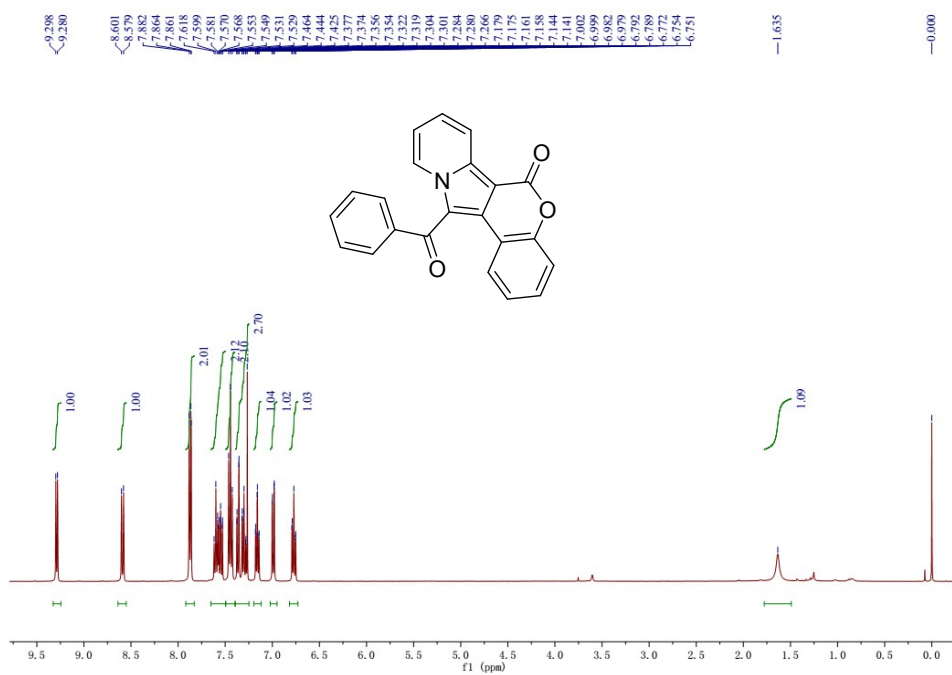

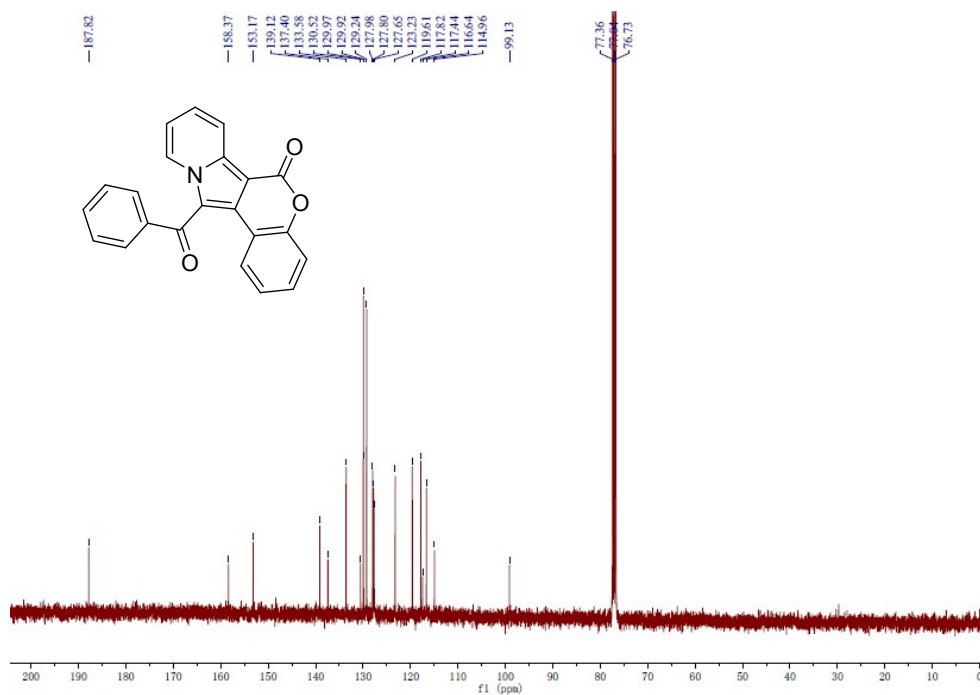

**Ethyl 5-oxo-3,5-diphenyl-2-(pyridin-2-yl)pentanoate (6d)**

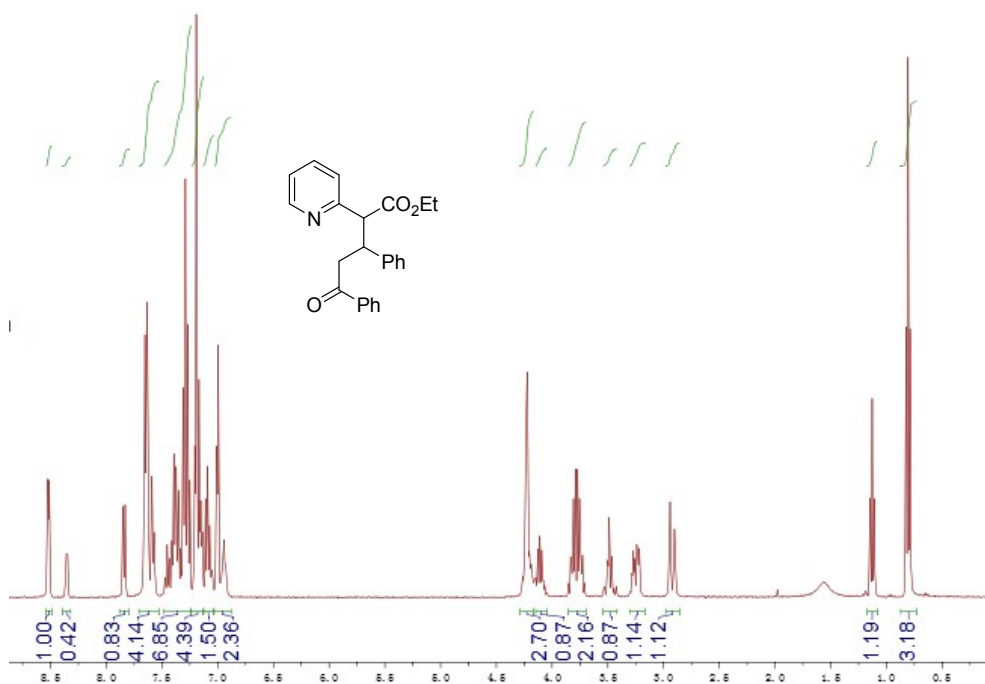



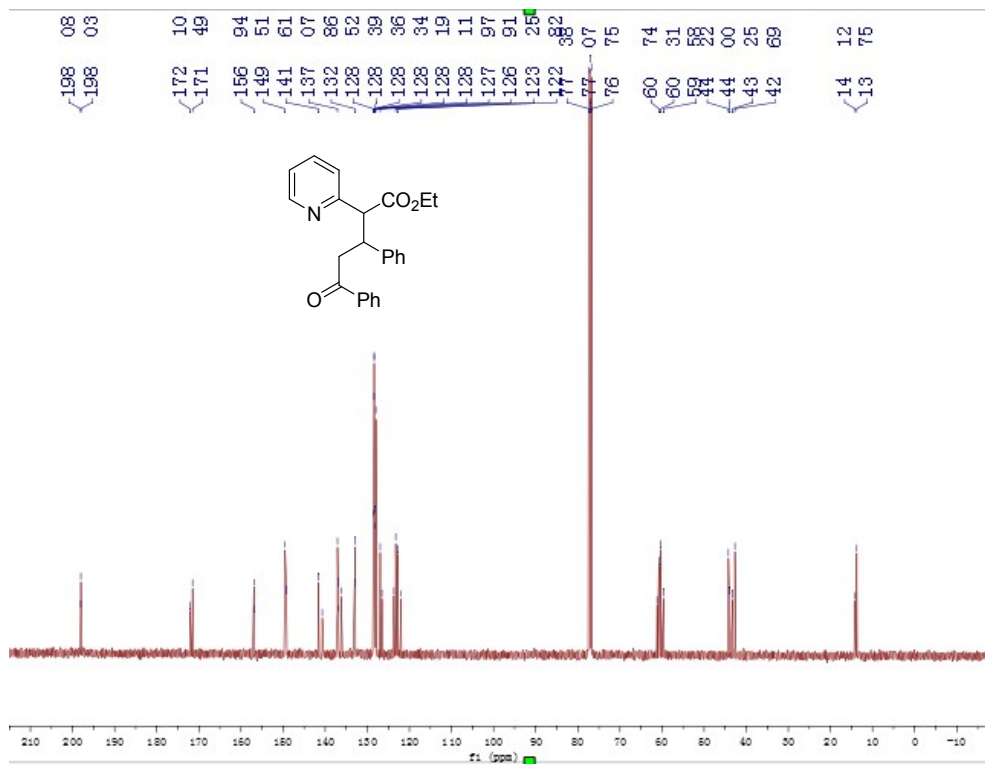

Supplement: c6ob01316c1.pdf [file c6ob01316c1.pdf]
